# Supplementary material
Source: ML conference proceedings conference paper supplement (https://openreview.net/forum?id=lJX9okHBVMb)
Supplement: supplementary_material [file attachment]

## A ORGANIZATION OF THE APPENDICES

This paper is a contribution to the mathematical foundations of machine learning, and our results are motivated by expanding the applicability and performance of neural networks. At the same time, we give precise mathematical formulations of our results and proofs. The purposes of these appendices are several:

1. To clarify the mathematical conventions and terminology, thus making the paper more accessible.
2. To provide full proofs of the main results.
3. To develop context around various construction appearing in the main text.
4. To discuss in detail examples, special cases, and generalizations of our results.
5. To specify implementation details for the experiments.

We now give a summary of the contents of the appendices.

Appendix [B](#) contains proofs the universal approximation results (Theorems [3](#) and [5](#)) stated in Section [4](#) of the main text, as well as proofs of additional bounded width results. The proofs use notation given in Appendix [B.1](#), and rely on preliminary topological considerations given in Appendix [B.2](#).

In Appendix [C](#) we give a proof of the model compression result given in Theorem [6](#) which appears in Section [5](#). For clarity and background we begin the appendix with a discussion of the version of the QR decomposition relevant for our purposes (Appendix [C.1](#)). We also establish elementary properties of radial rescaling activations (Appendix [C.2](#)).

The focus of Appendix [D](#) is projected gradient descent, elaborating on Section [6](#). We first prove a result on the interaction of gradient descent and orthogonal transformations (Appendix [D.1](#)), before formulating projected gradient descent in more detail (Appendix [D.2](#)), and introducing the so-called interpolating space (Appendix [D.3](#)). We restate Theorem [8](#) in more convenient notation (Appendix [D.4](#)) before proceeding to the proof (Appendix [D.5](#)).

Appendix [E](#) contains implementation details for the experiments summarized in Section [7](#). Several of our implementations use shifted radial rescaling activations, which we formulate in Appendix [E.1](#).

Appendix [F](#) explains the connection between our constructions and radial basis functions networks. While radial neural networks turn out to be a specific type of radial basis functions network, our universality results are not implied by those for general radial basis functions networks.

## B UNIVERSAL APPROXIMATION PROOFS AND ADDITIONAL RESULTS

In this section, we provide full proofs of the universal approximation (UA) results for radial neural networks, as stated in Section [4](#). In order to do so, we first clarify our notational conventions (Appendix [B.1](#)), and collect basic topological results (Appendix [B.2](#)).

### B.1 NOTATION

Recall that, for a point  $c$  in the Euclidean space  $\mathbb{R}^n$  and a positive real number  $r$ , we denote the  $r$ -ball around  $c$  by  $B_r(c) = \{x \in \mathbb{R}^n \mid |x - c| < r\}$ . All networks in this section have the Step-ReLU radial rescaling activation function, defined as:

$$\rho : \mathbb{R}^n \longrightarrow \mathbb{R}^n, \quad z \longmapsto \begin{cases} z & \text{if } |z| \geq 1 \\ 0 & \text{otherwise} \end{cases}$$

Throughout,  $\circ$  denotes the composition of functions. We identify a linear map with a corresponding matrix (in the standard bases). In the case of linear maps, the operation  $\circ$  can be identified with matrix multiplication. Recall also that an affine map  $L : \mathbb{R}^n \rightarrow \mathbb{R}^m$  is one of the form  $L(x) = Ax + b$  for a matrix  $A \in \mathbb{R}^{m \times n}$  and  $b \in \mathbb{R}^m$ .

## B.2 TOPOLOGY

Let  $K$  be a compact subset of  $\mathbb{R}^n$  and let  $f : K \rightarrow \mathbb{R}^m$  be a continuous function.

**Lemma 9.** *For any  $\epsilon > 0$ , there exist  $c_1, \dots, c_N \in K$  and  $r_1, \dots, r_N \in (0, 1)$  such that, first, the union of the balls  $B_{r_i}(c_i)$  covers  $K$ ; second, for all  $i$ , we have  $f(B_{r_i}(c_i) \cap K) \subseteq B_\epsilon(f(c_i))$ .*

*Proof.* The continuity of  $f$  implies that for each  $c \in K$ , there exists  $r = r_c$  such that  $f(B_{r_c}(c) \cap K) \subseteq B_\epsilon(f(c))$ . The subsets  $B_{r_c}(c) \cap K$  form an open cover of  $K$ . The compactness of  $K$  implies that there is a finite subcover. The result follows.  $\square$

We also prove a variation of Lemma 9 that additionally guarantees that none of the balls in the cover of  $K$  contains the center point of another ball.

**Lemma 10.** *For any  $\epsilon > 0$ , there exist  $c_1, \dots, c_M \in K$  and  $r_1, \dots, r_M \in (0, 1)$  such that, first, the union of the balls  $B_{r_i}(c_i)$  covers  $K$ ; second, for all  $i$ , we have  $f(B_{r_i}(c_i)) \subseteq B_\epsilon(f(c_i))$ ; and, third,  $|c_i - c_j| \geq r_i$ .*

*Proof.* Because  $f$  is continuous on a compact domain, it is uniformly continuous. So, there exists  $r > 0$  such that  $f(B_r(c) \cap K) \subseteq B_\epsilon(f(c))$  for each  $c \in K$ . Because  $K$  is compact it has a finite volume, and so does  $B_{r/2}(K) = \bigcup_{c \in K} B_{r/2}(c)$ . Hence, there exists a finite maximal packing of  $B_{r/2}(K)$  with balls of radius  $r/2$ . That is, a collection  $c_1, \dots, c_M \in B_{r/2}(K)$  such that, for all  $i$ ,  $B_{r/2}(c_i) \subseteq B_{r/2}(K)$  and, for all  $j \neq i$ ,  $B_{r/2}(c_i) \cap B_{r/2}(c_j) = \emptyset$ . The first condition implies that  $c_i \in K$ . The second condition implies that  $|c_i - c_j| \geq r$ . Finally, we argue that  $K \subseteq \bigcup_{i=1}^M B_r(c_i)$ . To see this, suppose, for a contradiction, that  $x \in K$  does not belong to  $\bigcup_{i=1}^M B_r(c_i)$ . Then  $B_{r/2}(c_i) \cap B_{r/2}(x) = \emptyset$ , and  $x$  could be added to the packing, which contradicts the fact that the packing was chosen to be maximal. So the union of the balls  $B_r(c_i)$  covers  $K$ .  $\square$

We turn our attention to the minimal choices of  $N$  and  $M$  in Lemmas 9 and 10.

**Definition 11.** Given  $f : K \rightarrow \mathbb{R}^m$  continuous and  $\epsilon > 0$ , let  $N(f, K, \epsilon)$  be the minimal choice of  $N$  in Lemma 9 and let  $M(f, K, \epsilon)$  be the minimal choice of  $M$  in Lemma 10.

Observe that  $M(f, K, \epsilon) \geq N(f, K, \epsilon)$ . In many cases, it is possible to give explicit bounds for the constants  $N(f, K, \epsilon)$  and  $M(f, K, \epsilon)$ . As an illustration, we give the argument in the case that  $K$  is the closed unit cube in  $\mathbb{R}^n$  and  $f : K \rightarrow \mathbb{R}^m$  is Lipschitz continuous.

**Proposition 12.** *Let  $K = [0, 1]^n \subset \mathbb{R}^n$  be the (closed) unit cube and let  $f : K \rightarrow \mathbb{R}^m$  be Lipschitz continuous with Lipschitz constant  $R$ . For any  $\epsilon > 0$ , we have:*

$$N(f, K, \epsilon) \leq \left\lceil \frac{R\sqrt{n}}{2\epsilon} \right\rceil^n \quad \text{and} \quad M(f, K, \epsilon) \leq \frac{\Gamma(n/2 + 1)}{\pi^{n/2}} \left( 2 + \frac{2R}{\epsilon} \right)^n.$$

*Proof.* For the first inequality, observe that the unit cube can be covered with  $\left\lceil \frac{R\sqrt{n}}{2\epsilon} \right\rceil^n$  cubes of side length  $\frac{2\epsilon}{R\sqrt{n}}$ . Each cube is contained in a ball of radius  $\frac{\epsilon}{R}$  centered at the center of the cube. (In general, a cube of side length  $a$  in  $\mathbb{R}^n$  is contained in a ball of radius  $\frac{a\sqrt{n}}{2}$ .) Lipschitz continuity implies that, for all  $x, x' \in K$ , if  $|x - x'| < \epsilon/R$  then  $|f(x) - f(x')| \leq R|x - x'| < \epsilon$ .

For the second inequality, let  $r = \epsilon/R$ . Lipschitz continuity implies that, for all  $x, x' \in K$ , if  $|x - x'| < r$  then  $|f(x) - f(x')| \leq R|x - x'| < \epsilon$ . The  $n$ -dimensional volume of the set of points with distance at most  $r/2$  to the unit cube is  $\text{vol}(B_{r/2}(K)) \leq (1 + r)^n$ . The volume of a ball with radius  $r/2$  is  $\text{vol}(B_{r/2}(0)) = \frac{\pi^{n/2}}{\Gamma(n/2 + 1)} (r/2)^n$ . Hence, any packing of  $B_{r/2}(K)$  with balls of radius  $r/2$  consists of at most

$$\frac{\text{vol}(B_{r/2}(K))}{\text{vol}(B_{r/2}(0))} \leq \frac{\Gamma(n/2 + 1)}{\pi^{n/2}} \left( 2 + \frac{2R}{\epsilon} \right)^n$$

such balls. So there also exists a maximal packing with at most that many balls. This packing can be used in the proof of Theorem 10, which implies that it is a bound on  $M(f, K, \epsilon)$ .  $\square$

We note in passing that any differentiable function  $f : K \rightarrow \mathbb{R}^n$  on a compact subset  $K$  of  $\mathbb{R}^n$  is Lipschitz continuous. Indeed, the compactness of  $K$  implies that there exists  $R$  such that  $|f'(x)| \leq R$  for all  $x \in K$ . Then one can take  $R$  to be the Lipschitz constant of  $f$ .

### B.3 PROOF OF THEOREM 3: UA FOR ASYMPTOTICALLY AFFINE FUNCTIONS

In this section, we restate and prove Theorem 3 which proves that radial neural networks are universal approximators of asymptotically affine functions. We recall the definition of such functions:

**Definition 13.** A function  $f : \mathbb{R}^n \rightarrow \mathbb{R}^m$  is *asymptotically affine* if there exists an affine function  $L : \mathbb{R}^n \rightarrow \mathbb{R}^m$  such that, for all  $\epsilon > 0$ , there exists a compact set  $K \subset \mathbb{R}^n$  such that  $|L(x) - f(x)| < \epsilon$  for all  $x \in \mathbb{R}^n \setminus K$ . We say that  $L$  is the limit of  $f$ .

**Remark 14.** An *asymptotically linear* function is defined in the same way, except  $L$  is taken to be linear (i.e., given just by applying matrix multiplication without translation). Hence any asymptotically linear function is in particular an asymptotically affine function, and Theorem 3 applies to asymptotically linear functions as well.

Given an asymptotically affine function  $f : \mathbb{R}^n \rightarrow \mathbb{R}^m$  and  $\epsilon > 0$ , let  $K$  be a compact set as in Definition 13. We apply Lemma 9 to the restriction  $f|_K$  of  $f$  to  $K$  and produce a minimal constant  $N = N(f|_K, K, \epsilon)$  as in Definition 11. We write simply  $N(f, K, \epsilon)$  for this constant.

**Theorem 3** (Universal approximation). *Let  $f : \mathbb{R}^n \rightarrow \mathbb{R}^m$  be an asymptotically affine function. For any  $\epsilon > 0$ , there exists a compact set  $K \subset \mathbb{R}^n$  and a function  $F : \mathbb{R}^n \rightarrow \mathbb{R}^m$  such that:*

1.  $F$  is the feedforward function of a radial neural network with  $N = N(f, K, \epsilon)$  layers whose hidden widths are  $(n+1, n+2, \dots, n+N)$ .
2. For any  $x \in \mathbb{R}^n$ , we have  $|F(x) - f(x)| < \epsilon$ .

*Proof.* By the hypothesis on  $f$ , there exists an affine function  $L : \mathbb{R}^n \rightarrow \mathbb{R}^m$  and a compact set  $K \subset \mathbb{R}^n$  such that  $|L(x) - f(x)| < \epsilon$  for all  $x \in \mathbb{R}^n \setminus K$ . Abbreviate  $N(f, K, \epsilon)$  by  $N$ . As in Lemma 9, fix  $c_1, \dots, c_N \in K$  and  $r_1, \dots, r_N \in (0, 1)$  such that, first, the union of the balls  $B_{r_i}(c_i)$  covers  $K$  and, second, for all  $i$ , we have  $f(B_{r_i}(c_i)) \subseteq B_\epsilon(f(c_i))$ . Let  $U = \bigcup_{i=1}^N B_{r_i}(c_i)$ , so that  $K \subset U$ . Define  $F : \mathbb{R}^n \rightarrow \mathbb{R}^m$  as:

$$F(x) = \begin{cases} L(x) & \text{if } x \notin U \\ f(c_j) & \text{where } j \text{ is the smallest index with } x \in B_{r_j}(c_j) \end{cases}$$

If  $x \notin U$ , then  $|F(x) - f(x)| = |L(x) - f(x)| < \epsilon$ . Hence suppose  $x \in U$ . Let  $j$  be the smallest index such that  $x \in B_{r_j}(c_j)$ . Then  $F(x) = f(c_j)$ , and, by the choice of  $r_j$ , we have:

$$|F(x) - f(x)| = |f(c_j) - f(x)| < \epsilon.$$

We proceed to show that  $F$  is the feedforward function of a radial neural network. Let  $e_1, \dots, e_N$  be orthonormal basis vectors extending  $\mathbb{R}^n$  to  $\mathbb{R}^{n+N}$ . We regard each  $\mathbb{R}^{n+i-1}$  as a subspace of  $\mathbb{R}^{n+i}$  by embedding into the first  $n+i-1$  coordinates. For  $i = 1, \dots, N$ , we set  $h_i = \sqrt{1 - r_i^2}$  and define the following affine transformations:

$$\begin{aligned} T_i : \mathbb{R}^{n+i-1} &\rightarrow \mathbb{R}^{n+i} & S_i : \mathbb{R}^{n+i} &\rightarrow \mathbb{R}^{n+i} \\ z &\mapsto z - c_i + h_i e_i & z &\mapsto z - (1 + h_i^{-1}) \langle e_i, z \rangle e_i + c_i + e_i \end{aligned}$$

where  $\langle e_i, z \rangle$  is the coefficient of  $e_i$  in  $z$ . Consider the radial neural network with widths  $(n, n+1, \dots, n+N, m)$ , whose affine transformations and activations are given by:

- For  $i = 1, \dots, N$  the affine transformation from layer  $i-1$  to layer  $i$  is given by  $z \mapsto T_i \circ S_{i-1}(z)$ , where  $S_0 = \text{id}_{\mathbb{R}^n}$ .
- The activation function at the  $i$ -th hidden layer is Step-ReLU on  $\mathbb{R}^{n+i}$ , that is:

$$\rho_i : \mathbb{R}^{n+i} \longrightarrow \mathbb{R}^{n+i}, \quad z \longmapsto \begin{cases} z & \text{if } |z| \geq 1 \\ 0 & \text{otherwise} \end{cases}$$

- The affine transformation from layer  $i = N$  to the output layer is

$$z \mapsto \Phi_{L,f,c} \circ S_N(z)$$

where  $\Phi_{L,f,c}$  is the affine transformation given by:

$$\Phi_{L,f,c} : \mathbb{R}^{n+N} \rightarrow \mathbb{R}^m, \quad x + \sum_{i=1}^N a_i e_i \mapsto L(x) + \sum_{i=1}^N a_i (f(c_i) - L(c_i))$$

which can be shown to be affine when  $L$  is affine. Indeed, write  $L(x) = Ax + b$  where  $A$  is a matrix in  $\mathbb{R}^{m \times n}$  and  $b \in \mathbb{R}^m$  is a vector. Then  $\Phi_{L,f,c}$  is the composition of the linear map given by the matrix

$$\begin{bmatrix} A & f(c_1) - L(c_1) & f(c_2) - L(c_2) & \cdots & f(c_N) - L(c_N) \end{bmatrix} \in \mathbb{R}^{m \times (n+N)}$$

and translation by  $b \in \mathbb{R}^m$ . Note that we regard each  $f(c_i) - L(c_i) \in \mathbb{R}^m$  as a column vector in the matrix above.

We claim that the feedforward function of the above radial neural network is exactly  $F$ . To show this, we first state a lemma, whose (omitted) proof is an elementary computation.

**Lemma 3.1.** For  $i = 1, \dots, N$ , the composition  $S_i \circ T_i$  is the embedding  $\mathbb{R}^{n+i-1} \hookrightarrow \mathbb{R}^{n+i}$ .

Next, recursively define  $G_i : \mathbb{R}^n \rightarrow \mathbb{R}^{n+i}$  via

$$G_i = S_i \circ \rho_i \circ T_i \circ G_{i-1},$$

where  $G_0 = \text{id}_{\mathbb{R}^n}$ . The function  $G_i$  admits an direct formulation:

**Proposition 3.2.** For  $i = 0, 1, \dots, N$ , we have:

$$G_i(x) = \begin{cases} x & \text{if } x \notin \bigcup_{j=1}^i B_{r_j}(c_j) \\ c_j + e_j & \text{where } j \leq i \text{ is the smallest index with } x \in B_{r_j}(c_j) \end{cases}.$$

*Proof.* We proceed by induction. The base step  $i = 0$  is immediate. For the induction step, assume the claim is true for  $i - 1$ , where  $0 \leq i - 1 < N$ . There are three cases to consider.

**Case 1.** Suppose  $x \notin \bigcup_{j=1}^i B_{r_j}(c_j)$ . Then in particular  $x \notin \bigcup_{j=1}^{i-1} B_{r_j}(c_j)$ , so the induction hypothesis implies that  $G_{i-1}(x) = x$ . Additionally,  $x \notin B_{r_i}(c_i)$ , so:

$$|T_i(x)| = |x - c_i + h_i e_i| = \sqrt{|x - c_i|^2 + h_i^2} \geq \sqrt{r_i^2 + 1 - r_i^2} = 1.$$

Using the definition of  $\rho_i$  and Lemma 3.1 we compute:

$$G_i(x) = S_i \circ \rho_i \circ T_i \circ G_{i-1}(x) = S_i \circ \rho_i \circ T_i(x) = S_i \circ T_i(x) = x.$$

**Case 2.** Suppose  $x \in B_j \setminus \bigcup_{k=1}^{j-1} B_{r_k}(c_k)$  for some  $j \leq i - 1$ . Then the induction hypothesis implies that  $G_{i-1}(x) = c_j + e_j$ . We compute:

$$|T_i(c_j + e_j)| = |c_j + e_j - c_i + h_i e_i| > |e_j| = 1.$$

Therefore,

$$G_i(x) = S_i \circ \rho_i \circ T_i(c_j + e_j) = S_i \circ T_i(c_j + e_j) = c_j + e_j.$$

**Case 3.** Finally, suppose  $x \in B_i \setminus \bigcup_{j=1}^{i-1} B_{r_j}(c_j)$ . The induction hypothesis implies that  $G_{i-1}(x) = x$ . Since  $x \in B_{r_i}(c_i)$ , we have:

$$|T_i(x)| = |x - c_i + h_i e_i| = \sqrt{|x - c_i|^2 + h_i^2} < \sqrt{r_i^2 + 1 - r_i^2} = 1.$$

Therefore:

$$G_i(x) = S_i \circ \rho_i \circ T_i(x) = S_i(0) = c_i + e_i.$$

This completes the proof of the proposition.  $\square$

Finally, we show that the function  $F$  defined at the beginning of the proof is the feedforward function of the above radial neural network. The computation is elementary:

$$\begin{aligned} F_{\text{feedforward}} &= \Phi_{L,f,c} \circ S_N \circ \rho_N \circ T_N \circ S_{N-1} \circ \rho_{N-1} \circ T_{N-1} \circ \cdots \circ S_1 \circ \rho_1 \circ T_1 \\ &= \Phi_{L,f,c} \circ G_N \\ &= F \end{aligned}$$

where the first equality follows from the definition of the feedforward function, the second from the definition of  $G_N$ , and the last from the case  $i = N$  of Proposition 3.2 together with the definition of  $\Phi_{L,f,c}$ . This completes the proof of the theorem.  $\square$

#### B.4 PROOF OF THEOREM 5: BOUNDED WIDTH UA FOR ASYMPTOTICALLY AFFINE FUNCTIONS

We restate and prove Theorem 5 which strengthens Theorem 3 by providing a bounded width radial neural network approximation of any asymptotically affine function.

**Theorem 5.** *Let  $f : \mathbb{R}^n \rightarrow \mathbb{R}^m$  be an asymptotically affine function. For any  $\epsilon > 0$ , there exists a compact set  $K \subset \mathbb{R}^n$  and a function  $F : \mathbb{R}^n \rightarrow \mathbb{R}^m$  such that:*

1.  *$F$  is the feedforward function of a radial neural network with  $N = N(f, K, \epsilon)$  hidden layers whose widths are all  $n + m + 1$ .*
2. *For any  $x \in \mathbb{R}^n$ , we have  $|F(x) - f(x)| < \epsilon$ .*

*Proof.* By the hypothesis on  $f$ , there exists an affine function  $L : \mathbb{R}^n \rightarrow \mathbb{R}^m$  and a compact set  $K \subset \mathbb{R}^n$  such that  $|L(x) - f(x)| < \epsilon$  for all  $x \in \mathbb{R}^n \setminus K$ . Given  $\epsilon > 0$ , let  $N = N(f, K, \epsilon)$  and use Lemma 9 to choose  $c_1, \dots, c_N \in K$  and  $r_1, \dots, r_N \in (0, 1)$  such that the union of the balls  $B_{r_i}(c_i)$  covers  $K$ , and, for all  $i$ , we have  $f(B_{r_i}(c_i)) \subseteq B_\epsilon(f(c_i))$ . Let  $s$  be the minimal non-zero value of  $|f(c_i) - f(c_j)|$  for  $i, j \in \{1, \dots, N\}$ , that is,  $s = \min_{i,j, f(c_i) \neq f(c_j)} |f(c_i) - f(c_j)|$ .

Using the decomposition  $\mathbb{R}^{n+m+1} \cong \mathbb{R}^n \times \mathbb{R}^m \times \mathbb{R}$ , we write elements of  $\mathbb{R}^{n+m+1}$  as  $(x, y, \theta)$ , where  $x \in \mathbb{R}^n$ ,  $y \in \mathbb{R}^m$ , and  $\theta \in \mathbb{R}$ . For  $i = 1, \dots, N$ , set:

$$T_i : \mathbb{R}^{n+m+1} \rightarrow \mathbb{R}^{n+m+1}, \quad (x, y, \theta) \mapsto \left( x - (1 - \theta)c_i, y - \theta \frac{f(c_i) - L(0)}{s}, (1 - \theta)h_i \right)$$

where  $h_i = \sqrt{1 - r_i^2}$ . Note that  $T_i$  is an invertible affine transformation, whose inverse is given by:

$$T_i^{-1}(x, y, \theta) = \left( x + \frac{\theta}{h_i}c_i, y + \left(1 - \frac{\theta}{h_i}\right) \frac{f(c_i) - L(0)}{s}, 1 - \frac{\theta}{h_i} \right)$$

For  $i = 1, \dots, N$ , define  $G_i : \mathbb{R}^n \rightarrow \mathbb{R}^{n+m+1}$  via the following recursive definition:

$$G_i = T_i^{-1} \circ \rho \circ T_i \circ G_{i-1},$$

where  $G_0(x) = (x, 0, 0) : \mathbb{R}^n \hookrightarrow \mathbb{R}^{n+m+1}$  is the inclusion, and  $\rho : \mathbb{R}^{n+m+1} \rightarrow \mathbb{R}^{n+m+1}$  is Step-ReLU on  $\mathbb{R}^{n+m+1}$ . We claim that, for  $x \in \mathbb{R}^n$ , we have:

$$G_i(x) = \begin{cases} (x, 0, 0) & \text{if } x \notin \bigcup_{j=1}^i B_{r_j}(c_j) \\ \left(0, \frac{f(c_j) - L(0)}{s}, 1\right) & \text{where } j \leq i \text{ is the smallest index with } x \in B_{r_j}(c_j) \end{cases}$$

This claim can be verified by a straightforward induction argument, similar to the one given in the proof of Proposition 3.2, and using the following key facts:

- For  $x \in \mathbb{R}^n$ ,  $|T_i((x, 0, 0))| = |(x - c_i, 0, h_i)| < 1$  if and only if  $|x - c_i| < r_i$ .
- $T_i^{-1}(0) = \left(0, \frac{f(c_i) - L(0)}{s}, 1\right)$ .
- $T_i\left(\left(0, \frac{f(c_j) - L(0)}{s}, 1\right)\right) = \left(0, \frac{f(c_j) - f(c_i)}{s}, 0\right)$ , which, by the choice of  $s$ , has norm at least 1 if  $f(c_j) \neq f(c_i)$ , and is 0 if  $f(c_j) = f(c_i)$ .

Let  $\Phi : \mathbb{R}^{n+m+1} \rightarrow \mathbb{R}^m$  denote the affine map sending  $(x, y, \theta)$  to  $L(x) + sy$ . It follows that  $F = \Phi \circ G_N$  satisfies

$$F(x) = \begin{cases} L(x) & \text{if } x \notin \bigcup_{j=1}^N B_{r_j}(c_j) \\ f(c_j) & \text{where } j \text{ is the smallest index with } x \in B_{r_j}(c_j) \end{cases}$$

By construction,  $F$  is the feedforward function of a radial neural network with  $N$  hidden layers whose widths are all  $n + m + 1$ . Let  $x \in \mathbb{R}^n$ . If  $x \in K$ , let  $j$  be the smallest index such that  $x \in B_{r_j}(c_j)$ . Then  $F(x) = f(c_j)$ , and, by the choice of  $r_j$ , we have  $|F(x) - f(x)| = |f(c_j) - f(x)| < \epsilon$ . Otherwise,  $x \in \mathbb{R}^n \setminus K$ , and  $|F(x) - f(x)| = |L(x) - f(x)| < \epsilon$ .  $\square$

#### B.5 ADDITIONAL RESULT: BOUND OF $\max(n, m) + 1$

We state and prove an additional bounded width result. In contrast to the results above, the theorem below only holds for functions defined on a compact domain, without assumptions about the asymptotic behavior. The proof is an adaptation of the proof of [Theorem 5](#), so we give only a sketch.

**Theorem 15.** *Let  $f : K \rightarrow \mathbb{R}^m$  be a continuous function, where  $K$  is a compact subset of  $\mathbb{R}^n$ . For any  $\epsilon > 0$ , there exists  $F : \mathbb{R}^n \rightarrow \mathbb{R}^m$  such that:*

1.  *$F$  is the feedforward function of a radial neural network with  $N(f, K, \epsilon)$  hidden layers whose widths are all  $\max(n, m) + 1$ .*
2. *For any  $x \in K$ , we have  $|F(x) - f(x)| < \epsilon$ .*

*Sketch of proof.* The construction appearing in the proof of [Theorem 5](#) with  $L \equiv 0$  can be used to produce a radial neural network with  $N(f, K, \epsilon)$  hidden layers with widths  $n + m + 1$  that approximates  $f$  on  $K$ . (Note that the approximation works only on  $K$ , as  $f$  is not defined outside of  $K$ .) All values in the hidden layers are of the form  $(x, 0, 0)$  or  $(0, y, 1)$ . We can therefore replace  $(x, y, \theta) \in \mathbb{R}^{n+m+1}$  by  $(x + y, \theta) \in \mathbb{R}^{\max(n, m)} \times \mathbb{R} \cong \mathbb{R}^{\max(n, m)+1}$  everywhere, without affecting any statements about the hidden layers. In particular, the transformation  $T_i$  becomes

$$T_i : \mathbb{R}^{\max(n, m)+1} \rightarrow \mathbb{R}^{\max(n, m)+1}, \quad (x, \theta) \mapsto \left( x - (1 - \theta)c_i - \theta \frac{f(c_i)}{s}, (1 - \theta)h_i \right).$$

With this change the final affine map  $\Phi$  sends  $(x, \theta)$  to  $sx$ . From the rest of the proof of [Theorem 5](#) it follows that the feedforward function  $F$  of the radial network satisfies  $|F(x) - f(x)| < \epsilon$  for all  $x \in K$ .  $\square$

#### B.6 ADDITIONAL RESULT: BOUND OF $\max(n, m)$

In this section, we prove a different version of the result of the previous section. Specifically, we reduce the bound on the widths to  $\max(n, m)$  at the cost of using more layers. Again, we focus on functions defined on a compact domain without assumptions about their asymptotic behavior. Recall the notation  $M(f, K, \epsilon)$  from [Theorem 10](#) and [Theorem 11](#).

**Theorem 16.** *Let  $f : K \rightarrow \mathbb{R}^m$  be a continuous function, where  $K$  is a compact subset of  $\mathbb{R}^n$  for  $n \geq 2$ . For any  $\epsilon > 0$ , there exists  $F : \mathbb{R}^n \rightarrow \mathbb{R}^m$  such that:*

1.  *$F$  is the feedforward function of a radial neural network with  $2M(f, K, \epsilon/2)$  hidden layers whose widths are all  $\max(n, m)$ .*
2. *For any  $x \in K$ , we have  $|F(x) - f(x)| < \epsilon$ .*

*Proof.* We first consider the proof in the case  $n = m$ . Set  $M = M(f, K, \epsilon)$ . As in Lemma [10](#), fix  $c_1, \dots, c_M \in K$  and  $r_1, \dots, r_M \in (0, 1)$  such that, first, the union of the balls  $B_{r_i}(c_i)$  covers  $K$ ; second, for all  $i$ , we have  $f(B_{r_i}(c_i)) \subseteq B_{\epsilon/2}(f(c_i))$ ; and third,  $|c_i - c_j| \geq r_i$  for  $i \neq j$ . For  $i = 1, \dots, M$ , set

$$T_i : \mathbb{R}^n \rightarrow \mathbb{R}^n, \quad x \mapsto \frac{x - c_i}{r_i},$$

and recursively define  $G_i : \mathbb{R}^n \rightarrow \mathbb{R}^n$  as  $G_i = T_i^{-1} \circ \rho \circ T_i \circ G_{i-1}$ , where  $G_0 = \text{id}_{\mathbb{R}^n}$  is the identity on  $\mathbb{R}^n$  and  $\rho : \mathbb{R}^n \rightarrow \mathbb{R}^n$  is Step-ReLU.

**Lemma 16.1.** For  $i = 0, 1, \dots, N$ , we have:

$$G_i(x) = \begin{cases} x & \text{if } x \notin \bigcup_{j=1}^i B_{r_j}(c_j) \\ c_j & \text{where } j \leq i \text{ is the smallest index with } x \in B_{r_j}(c_j). \end{cases}$$

We omit the full proof of Lemma 16.1 as it is a standard induction argument similar to Proposition 3.2, relying on the following two facts. First,  $|T_i(x)| < 1$  if and only if  $x \in B_{r_i}(c_i)$ . Second, by the choice of  $c_i$ , we have  $|c_i - c_j| \geq r_i$  for all  $i \neq j$ . This implies that  $|T_i(c_j)| \geq 1$  for  $i \neq j$ .

Next, perform the following loop over  $i = 1, \dots, M$ :

- Set  $P_{i-1} = \{c_1, \dots, c_M\} \cup \{d_1, \dots, d_{i-1}\}$
- Choose  $d_i$  in  $B_{\epsilon/2}(f(c_i))$  that is not colinear with any pair of points in  $P_{i-1}$ . This is where we use the hypothesis that  $n \geq 2$ .
- Let  $s_i$  be the minimum distance between any point on the line through  $c_i$  and  $d_i$  and any point in  $P_{i-1} \setminus \{c_i\}$ .
- Let  $U_i : \mathbb{R}^n \rightarrow \mathbb{R}^n$  be the following affine transformation:

$$U_i : \mathbb{R}^n \rightarrow \mathbb{R}^n, \quad x \mapsto \frac{x - d_i}{s_i} + \left( \frac{1}{|c_i - d_i|} - \frac{1}{s_i} \right) \frac{\langle x - d_i, c_i - d_i \rangle}{|c_i - d_i|^2} (c_i - d_i)$$

- Define  $H_i : \mathbb{R}^n \rightarrow \mathbb{R}^n$  recursively as  $H_i = U_i^{-1} \circ \rho \circ U_i \circ H_{i-1}$ , where  $H_0 = \text{id}_{\mathbb{R}^n}$ .

We note that the transformation  $U_i$  can also be written as  $A_i(x - d_i)$  where  $A_i$  is the linear map given by  $A_i = \frac{1}{s_i} \text{proj}_{\langle c_i - d_i \rangle^\perp} + \frac{1}{|c_i - d_i|} \text{proj}_{\langle c_i - d_i \rangle}$ , which involves the projections onto the line spanned by  $c_i - d_i$  and onto the orthogonal complement of this line.

**Lemma 16.2.** For  $i, j = 1, \dots, M$ , we have:

$$H_i(c_j) = \begin{cases} d_j & \text{if } j \leq i \\ c_j & \text{if } j > i \end{cases}$$

*Proof.* It is immediate that  $U_i(d_i) = 0$  and  $|U_i(c_i)| = 1/2$ . It is also straightforward to show, using the choice of  $s_i$ , that  $|U_i(p)| \geq 1$  for all  $p \in P_{i-1} \setminus \{c_i\}$ . It follows that  $U_i^{-1} \circ \rho \circ U_i$  sends  $c_i$  to  $d_i$  and fixes all other points in  $P_{i-1}$ .  $\square$

**Lemma 16.3.** For  $x \in K$ , we have  $H_M \circ G_M(x) = d_i$  where  $i$  is the smallest index with  $x \in B_{r_i}(c_i)$

*Proof.* Let  $x \in K$ . By Lemma 16.1, we have that  $G_M(x) = c_i$  where  $i$  is the smallest index with  $x \in B_{r_i}(c_i)$ . (We use the fact that the balls  $\{B_{r_i}(c_i)\}$  cover  $K$ .) By Lemma 16.2, we have that  $H_M(c_i) = d_i$  for all  $i$ . The result follows.  $\square$

Set  $F = H_M \circ G_M$ . We see that, for  $x \in K$ :

$$|F(x) - f(x)| = |d_i - f(x)| \leq |d_i - f(c_i)| + |f(c_i) - f(x)| < \epsilon/2 + \epsilon/2 = \epsilon$$

where  $i$  is the smallest index with  $x \in B_{r_i}(c_i)$ . We show that  $F$  is the feedforward function of a radial neural network with  $2M$  hidden layers, all of width equal to  $n$ . Indeed, take the affine transformations and activations as follows:

- For  $i = 1, \dots, M$  the affine transformation from layer  $i - 1$  to layer  $i$  is given by  $x \mapsto T_i \circ T_{i-1}^{-1}(x)$ , where  $T_0 = \text{id}_{\mathbb{R}^n}$ .
- For  $i = 1, \dots, M$  the affine transformation from layer  $M + i - 1$  to layer  $M + i$  is given by  $x \mapsto U_i \circ U_{i-1}^{-1}(x)$ , where  $U_0 = T_N^{-1}$ .
- The activation at each hidden layer is Step-ReLU on  $\mathbb{R}^n$  that is  $\rho(x) = x$  if  $|x| \geq 1$  and 0 otherwise.



- Layer  $2M + 1$  has the affine transformation  $U_M^{-1}$ .

It is immediate from definitions that the feedforward function of this network is  $F$ .

To conclude the proof, we discuss the cases where  $n \neq m$ . Suppose  $n < m$  so that  $\max(n, m) = m$ . Then we can regard  $K$  as a compact subset of  $\mathbb{R}^m$  and apply the above constructions. Suppose  $n > m$  so that  $\max(n, m) = n$ . Let  $\text{inc} : \mathbb{R}^m \hookrightarrow \mathbb{R}^n$ . Apply the above constructions to the function  $\tilde{f} = \text{inc} \circ f : K \rightarrow \mathbb{R}^n$ .  $\square$

## C MODEL COMPRESSION PROOFS

The aim of this appendix is to give a proof of Theorem 6. In order to do so, we first (1) provide background on a relevant version of the QR decomposition, and (2) establish basic properties of radial rescaling activations.

### C.1 THE QR DECOMPOSITION

In this section, we recall the QR decomposition and note several relevant facts. For integers  $n$  and  $m$ , let  $(\mathbb{R}^{n \times m})^{\text{upper}}$  denote the vector space of upper triangular  $n$  by  $m$  matrices.

**Theorem 17** (QR Decomposition). *The following map is surjective:*

$$\begin{aligned} O(n) \times (\mathbb{R}^{n \times m})^{\text{upper}} &\longrightarrow \mathbb{R}^{n \times m} \\ Q, R &\mapsto Q \circ R \end{aligned}$$

In other words, any matrix can be written as the product of an orthogonal matrix and an upper-triangular matrix. When  $m \leq n$ , the last  $n - m$  rows of any matrix in  $(\mathbb{R}^{n \times m})^{\text{upper}}$  are zero, and the top  $m$  rows form an upper-triangular  $m$  by  $m$  matrix. These observations lead to the following “complete” version of the QR decomposition, which coincides with the above result when  $m \geq n$ :

**Corollary 18** (Complete QR Decomposition). *The following map is surjective:*

$$\begin{aligned} \mu : O(n) \times (\mathbb{R}^{k \times m})^{\text{upper}} &\longrightarrow \mathbb{R}^{n \times m} \\ Q, R &\mapsto Q \circ \text{inc} \circ R \end{aligned}$$

where  $k = \min(n, m)$  and  $\text{inc} : \mathbb{R}^k \hookrightarrow \mathbb{R}^n$  is the standard inclusion into the first  $k$  coordinates.

We make some remarks:

1. There are several algorithms for computing the QR decomposition of a given matrix. One is Gram–Schmidt orthogonalization, and another is the method of Householder reflections. The latter has computational complexity  $O(n^2m)$  in the case of a  $n \times m$  matrix with  $n \geq m$ . The package `numpy` includes a function `numpy.linalg.qr` that computes the QR decomposition of a matrix using Householder reflections.
2. In each iteration of the loop in Algorithm 1, the method `QR-decomp` with `mode = 'complete'` takes as input a matrix  $A_i$  of size  $n_i \times (n_{i-1}^{\text{red}} + 1)$ , and produces an orthogonal matrix  $Q_i \in O(n_i)$  and an upper-triangular matrix  $R_i$  of size  $\min(n_i, n_{i-1}^{\text{red}} + 1) \times (n_{i-1}^{\text{red}} + 1)$  such that  $A_i = Q_i \circ \text{inc}_i \circ R_i$ . Note that  $n_i^{\text{red}} = \min(n_i, n_{i-1}^{\text{red}} + 1)$ .
3. The QR decomposition is not unique in general, or, in other words, the map  $\mu$  is not injective in general. For example, if  $n > m$ , each fiber of  $\mu$  contains a copy of the orthogonal group  $O(n - m)$ .
4. The QR decomposition is unique (in a certain sense) for invertible square matrices. To be precise, let  $B_n^+$  be the subset of  $(\mathbb{R}^{n \times n})^{\text{upper}}$  consisting of upper triangular  $n$  by  $n$  matrices with positive entries along the diagonal. Both  $B_n^+$  and  $O(n)$  are subgroups of the general linear group  $\text{GL}_n(\mathbb{R})$ , and the multiplication map  $O(n) \times B_n^+ \rightarrow \text{GL}_n(\mathbb{R})$  is bijective. However, the QR decomposition is not unique for non-invertible square matrices.



## C.2 RADIAL RESCALING FUNCTIONS

We now prove the following basic facts about radial rescaling functions:

**Lemma 19.** *Let  $\rho = h^{(n)} : \mathbb{R}^n \rightarrow \mathbb{R}^n$  be a radial rescaling function on  $\mathbb{R}^n$ .*

1. *The function  $\rho$  commutes with any orthogonal transformation of  $\mathbb{R}^n$ . That is,  $\rho \circ Q = Q \circ \rho$  for any  $Q \in O(n)$ .*
2. *If  $m \leq n$  and  $\text{inc} : \mathbb{R}^m \hookrightarrow \mathbb{R}^n$  is the standard inclusion into the first  $m$  coordinates, then:  $h^{(n)} \circ \text{inc} = \text{inc} \circ h^{(m)}$ .*

*Proof.* Suppose  $Q \in O(n)$  is an orthogonal transformation of  $\mathbb{R}^n$ . Since  $Q$  is norm-preserving, we have  $|Qv| = |v|$  for any  $v \in \mathbb{R}^n$ . Since  $Q$  is linear, we have  $Q(\lambda v) = \lambda Qv$  for any  $\lambda \in \mathbb{R}$  and  $v \in \mathbb{R}^n$ . Using the definition of  $a = h^{(n)}$  we compute:

$$\rho(Qv) = \frac{h(|Qv|)}{|Qv|} Qv = \frac{h(|v|)}{|v|} Qv = Q \left( \frac{h(|v|)}{|v|} v \right) = Q(\rho(v)).$$

The first claim follows. The second claim is an elementary verification.  $\square$

More generally, the restriction of the radial rescaling function  $\rho$  to a linear subspace of  $\mathbb{R}^n$  is a radial rescaling function on that subspace. Given a tuple radial rescaling functions  $\boldsymbol{\rho} = (\rho_i : \mathbb{R}^{n_i} \rightarrow \mathbb{R}^{n_i})_{i=1}^L$  suited to widths  $\mathbf{n} = (n_i)_{i=1}^L$ , we write  $\boldsymbol{\rho}^{\text{red}} = (\rho_i^{\text{red}} : \mathbb{R}^{n_i^{\text{red}}} \rightarrow \mathbb{R}^{n_i^{\text{red}}})$  for the tuple of restrictions suited to the reduced widths  $\mathbf{n}^{\text{red}}$ , so that  $\rho_i^{\text{red}} = \rho_i \Big|_{\mathbb{R}^{n_i^{\text{red}}}}$ .

## C.3 PROOF OF THEOREM 6

Adopting notation from above and Section 5, we now restate and prove Theorem 6.

**Theorem 6.** *Let  $(\mathbf{W}, \mathbf{b}, \rho)$  be a radial neural network with widths  $\mathbf{n}$ . Let  $\mathbf{W}^{\text{red}}$  and  $\mathbf{b}^{\text{red}}$  be the weights and biases of the compressed network produced by Algorithm 7. The feedforward function of the original network  $(\mathbf{W}, \mathbf{b}, \rho)$  coincides with that of the compressed network  $(\mathbf{W}^{\text{red}}, \mathbf{b}^{\text{red}}, \boldsymbol{\rho}^{\text{red}})$ .*

*Proof.* Let  $(\mathbf{W}^{\text{red}}, \mathbf{b}^{\text{red}}, \mathbf{Q}) = \text{QR-Compress}(\mathbf{W}, \mathbf{b})$  be the output of Algorithm 1, so that  $\mathbf{Q} \in O(\mathbf{n}^{\text{hid}})$  and  $(\mathbf{W}^{\text{red}}, \mathbf{b}^{\text{red}}, \boldsymbol{\rho}^{\text{red}})$  is a neural network with widths  $\mathbf{n}^{\text{red}}$  and radial rescaling activations  $\rho_i^{\text{red}} = \rho_i \Big|_{\mathbb{R}^{n_i^{\text{red}}}}$ . Let  $F = F_{(\mathbf{W}, \mathbf{b}, \rho)}$  denote the feedforward function of the radial neural network with parameters  $(\mathbf{W}, \mathbf{b})$  and activations  $\rho$ . Similarly, let  $F^{\text{red}} = F_{(\mathbf{W}^{\text{red}}, \mathbf{b}^{\text{red}}, \boldsymbol{\rho}^{\text{red}})}$  denote the feedforward function of the radial neural network with parameters  $(\mathbf{W}^{\text{red}}, \mathbf{b}^{\text{red}})$  and activations  $\boldsymbol{\rho}^{\text{red}}$ . Additionally, we have the partial feedforward functions  $F_i$  and  $F_i^{\text{red}}$ . We show by induction that

$$F_i = Q_i \circ \text{inc}_i \circ F_i^{\text{red}}$$

for any  $i = 0, 1, \dots, N$ . (Continuing conventions from Sections 5.1 and 5.2 we set  $Q_0 = \text{id}_{\mathbb{R}^{n_0}}$ ,  $Q_L = \text{id}_{\mathbb{R}^{n_L}}$ , and  $\text{inc}_i : \mathbb{R}^{n_i^{\text{red}}} \rightarrow \mathbb{R}^{n_i}$  to be the inclusion map.) The base step  $i = 0$  is immediate. For the induction step, let  $x \in \mathbb{R}^{n_0}$ . Then:

$$\begin{aligned} F_i(x) &= \rho_i(W_i \circ F_{i-1}(x) + b_i) \\ &= \rho_i(W_i \circ Q_{i-1} \circ \text{inc}_{i-1} \circ F_{i-1}^{\text{red}}(x) + b_i) \\ &= \rho_i \left( [b_i \quad W_i \circ Q_{i-1} \circ \text{inc}_{i-1}] \begin{bmatrix} 1 \\ F_{i-1}^{\text{red}}(x) \end{bmatrix} \right) \\ &= \rho_i \left( Q_i \circ \text{inc}_i \circ [b_i^{\text{red}} \quad W_i^{\text{red}}] \begin{bmatrix} 1 \\ F_{i-1}^{\text{red}}(x) \end{bmatrix} \right) \\ &= Q_i \circ \text{inc}_i \circ \rho_i \Big|_{\mathbb{R}^{n_i^{\text{red}}}} (W_i^{\text{red}} \circ F_{i-1}^{\text{red}}(x) + b_i^{\text{red}}) \\ &= Q_i \circ \text{inc}_i \circ F_i^{\text{red}} \end{aligned}$$

The first equality relies on the definition of the partial feedforward function  $F_i$ ; the second on the induction hypothesis; the fourth on an inspection of Algorithm 1, noting that  $R_i = [b_i^{\text{red}} W_i^{\text{red}}]$ ; the fifth on the results of Lemma 19, observing that  $\rho_i \circ \text{inc}_i = \rho_i|_{\mathbb{R}^{n_i^{\text{red}}}} = \text{inc}_i \circ \rho_i^{\text{red}}$ ; and the sixth on the definition of  $F_i^{\text{red}}$ . In the case  $i = L$ , we have:

$$F = F_L = Q_L \circ \text{inc}_L \circ F_L^{\text{red}} = F^{\text{red}}$$

since  $Q_L = \text{inc}_L = \text{id}_{\mathbb{R}^{n_L}}$  and  $F_L^{\text{red}} = F^{\text{red}}$ . The theorem now follows.  $\square$

The techniques of the above proof can be used to show that the action of the group  $O(\mathbf{n}^{\text{hid}})$  of orthogonal change-of-basis symmetries on the parameter space  $\text{Param}(\mathbf{n})$  leaves the feedforward function unchanged. We do not use this result directly, but state it precisely it nonetheless:

**Proposition 20.** *Let  $(\mathbf{W}, \mathbf{b}, \rho)$  be a radial neural network with widths vector  $\mathbf{n}$ . Suppose  $\mathbf{g} \in O(\mathbf{n}^{\text{hid}})$ . Then the original and transformed networks have the same feedforward function:*

$$F_{(\mathbf{g} \cdot \mathbf{W}, \mathbf{g} \cdot \mathbf{b}, \rho)} = F_{(\mathbf{W}, \mathbf{b}, \rho)}$$

In other words, fix parameters  $(\mathbf{W}, \mathbf{b}) \in \text{Param}(\mathbf{n})$ , radial rescaling activations  $\rho$ , and  $\mathbf{g} \in O(\mathbf{n}^{\text{hid}})$ . Then the radial neural network with parameters  $(\mathbf{W}, \mathbf{b})$  has the same feedforward function as the radial neural network with transformed parameters  $(\mathbf{g} \cdot \mathbf{W}, \mathbf{g} \cdot \mathbf{b})$ , where we take radial rescaling activations  $\rho$  in both cases.

We remark that Proposition 20 is analogous to the “non-negative homogeneity” (or “positive scaling invariance”) of the pointwise ReLU activation function<sup>3</sup>. In that setting, instead of considering the product of orthogonal groups  $O(\mathbf{n}^{\text{hid}})$ , one considers the rescaling action of the following subgroup of  $\prod_{i=1}^{L-1} \text{GL}_{n_i}$ :

$$G = \left\{ \mathbf{g} = (g_i) \in \prod_{i=1}^{L-1} \text{GL}_{n_i} \mid \text{each } g_i \text{ is diagonal with positive diagonal entries} \right\}$$

Note that  $G$  is isomorphic to the product  $\prod_{i=1}^{L-1} \mathbb{R}_{>0}^{n_i}$ , and the action on  $\text{Param}(\mathbf{n})$  is given by the same formulas as those appearing near the end of Section 5.1. The feedforward function of a MLP with pointwise ReLU activations is invariant for the action of  $G$  on  $\text{Param}(\mathbf{n})$ .

## D PROJECTED GRADIENT DESCENT PROOFS

In this section, we give a proof of Theorem 8, which relates projected gradient descent for a representation with dimension  $\mathbf{n}$  to (usual) gradient descent for the corresponding reduced representation with dimension vector  $\mathbf{n}^{\text{red}}$ . This proof requires some set up and background results.

### D.1 GRADIENT DESCENT AND ORTHOGONAL SYMMETRIES

We first prove a result that gradient descent commutes with invariant orthogonal transformations. This section is general and departs from the specific case of radial neural networks.

#### D.1.1 SETTING

Let  $\mathcal{L} : V = \mathbb{R}^p \rightarrow \mathbb{R}$  be a smooth function. Semantically,  $V$  is the parameter space of a neural network and  $\mathcal{L}$  the loss function with respect to a batch of training data. The differential  $d\mathcal{L}_v$  of  $\mathcal{L}$

<sup>3</sup>See Armenta and Jodoin, *The Representation Theory of Neural Networks*, arXiv:2007.12213; Dinh, Pascanu, Bengio, and Bengio, *Sharp Minima Can Generalize For Deep Nets*, ICML 2017; Meng, Zheng, Zhang, Chen, Ye, Ma, Yu, and Liu, *G-SGD: Optimizing ReLU Neural Networks in its Positively Scale-Invariant Space*, 2019; and Neyshabur, Salakhutdinov, and Srebro. *Path-SGD: path-normalized optimization in deep neural networks*, NIPS’15.

at  $v \in V$  is row vector, while the gradient  $\nabla_v \mathcal{L}$  of  $\mathcal{L}$  at  $v$  is a column vector<sup>4</sup>:

$$d\mathcal{L}_v = \left[ \left. \frac{\partial \mathcal{L}}{\partial x_1} \right|_v \quad \cdots \quad \left. \frac{\partial \mathcal{L}}{\partial x_p} \right|_v \right] \quad \nabla_v \mathcal{L} = \begin{bmatrix} \left. \frac{\partial \mathcal{L}}{\partial x_1} \right|_v \\ \vdots \\ \left. \frac{\partial \mathcal{L}}{\partial x_p} \right|_v \end{bmatrix}$$

Hence  $\nabla_v \mathcal{L}$  is the transpose of  $d\mathcal{L}_v$ , that is:  $\nabla_v \mathcal{L} = (d\mathcal{L}_v)^T$ . A step of gradient descent with respect to  $\mathcal{L}$  at learning rate  $\eta > 0$  is defined as:

$$\begin{aligned} \gamma &= \gamma_\eta : V \longrightarrow V \\ v &\longmapsto v - \eta \nabla_v \mathcal{L} \end{aligned}$$

We drop  $\eta$  from the notation when it is clear from context. For any  $k \geq 0$ , we denote by  $\gamma^k$  the  $k$ -fold composition of the gradient descent map  $\gamma$ :

$$\gamma^k = \overbrace{\gamma \circ \gamma \circ \cdots \circ \gamma}^k$$

#### D.1.2 INVARIANT GROUP ACTION

Now suppose  $\rho : G \rightarrow \text{GL}(V)$  is an action of a Lie group  $G$  on  $V$  such that  $\mathcal{L}$  is  $G$ -invariant, i.e.:

$$\mathcal{L}(\rho(g)(v)) = \mathcal{L}(v)$$

for all  $g \in G$  and  $v \in V$ . We write simply  $g \cdot v$  for  $\rho(g)(v)$ , and  $g$  for  $\rho(g)$ .

**Lemma 21.** *For any  $v \in V$  and  $g \in G$ , we have:*

$$\nabla_v \mathcal{L} = g^T \cdot (\nabla_{g \cdot v} \mathcal{L})$$

*Proof.* The proof is a computation:

$$\begin{aligned} \nabla_v \mathcal{L} &= (d_v \mathcal{L})^T = (d(\mathcal{L} \circ g)_v)^T = (d\mathcal{L}_{g \cdot v} \circ dg_v)^T = (d\mathcal{L}_{g \cdot v} \circ g)^T = g^T \cdot (d\mathcal{L}_{g \cdot v})^T \\ &= g^T \cdot (\nabla_{g \cdot v} \mathcal{L}) \end{aligned}$$

The second equality relies on the hypothesis that  $\mathcal{L} \circ g = \mathcal{L}$ , the third on the chain rule, and the fourth on the fact that  $dg_v = g$  since  $g$  is a linear map.  $\square$

One can perform the computation of the proof in coordinates, for  $i = 1, \dots, p$ :

$$\begin{aligned} (\nabla_v \mathcal{L})_i &= (d\mathcal{L}_v)^i = \left. \frac{\partial \mathcal{L}}{\partial x_i} \right|_v = \left. \frac{\partial (\mathcal{L} \circ g)}{\partial x_i} \right|_v = \left. \frac{\partial \mathcal{L}}{\partial x_j} \right|_{g \cdot v} \frac{\partial g_j}{\partial x_i} \Big|_v \\ &= (\nabla_{g \cdot v} \mathcal{L})_j g_j^i = (g^T)_i^j (\nabla_{g \cdot v} \mathcal{L})_j = (g^T \cdot \nabla_{g \cdot v} \mathcal{L})_i \end{aligned}$$

#### D.1.3 ORTHOGONAL CASE

Furthermore, suppose the action of  $G$  is by orthogonal transformations, so that  $\rho(g)^T = \rho(g)^{-1}$  for all  $g \in G$ . Then Lemma 21 implies that

$$\nabla_{g \cdot v} \mathcal{L} = g \cdot \nabla_v \mathcal{L} \tag{D.1}$$

for any  $v \in V$  and  $g \in G$ . The proof of the following lemma is immediate from Equation D.1 together with the definition of  $\gamma$ . See Figure 6 for an illustration.

**Lemma 22.** *Suppose the action of  $G$  on  $V$  is by orthogonal transformations, and that  $\mathcal{L}$  is  $G$ -invariant. Then the action of  $G$  commutes with gradient descent (for any learning rate). That is,*

$$\gamma^k(g \cdot v) = g \cdot \gamma^k(v)$$

for any  $v \in V$ ,  $g \in G$ , and  $k \geq 0$ .

<sup>4</sup>Following usual conventions, we regard column vectors as elements of  $V$  and row vectors as elements of the dual vector space  $V^*$ . The differential  $d\mathcal{L}_v$  of  $\mathcal{L}$  at  $v \in V$  is also known as the Jacobian of  $\mathcal{L}$  at  $v \in V$ .

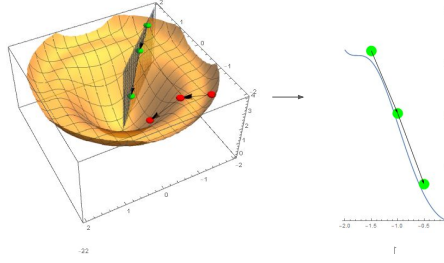

Figure 6: Illustration of Lemma 22. If the loss is invariant with respect to an orthogonal transformation  $Q$  of the parameter space, then optimization of the network by gradient descent is also invariant with respect to  $Q$ . (Note: in this example, projected and usual gradient descent match; this is not the case in higher dimensions, as explained in D.6.)

## D.2 GRADIENT DESCENT NOTATION AND SET-UP

We now turn our attention back to radial neural networks. In this section, we recall notation from above, and introduce new notation that will be relevant for the formulation and proof of Theorem 8.

### D.2.1 MERGING WIDTHS AND BIASES

Let  $\mathbf{n} = (n_0, n_1, n_2, \dots, n_{L-1}, n_L)$  be the widths vector of an MLP. Recall the definition of  $\text{Param}(\mathbf{n})$  as the parameter space of all possible choices of trainable parameters:

$$\text{Param}(\mathbf{n}) = (\mathbb{R}^{n_1 \times n_0} \times \mathbb{R}^{n_2 \times n_1} \times \dots \times \mathbb{R}^{n_L \times n_{L-1}}) \times (\mathbb{R}^{n_1} \times \mathbb{R}^{n_2} \times \dots \times \mathbb{R}^{n_L})$$

We have been denoting an element therein as a pair of tuples  $(\mathbf{W}, \mathbf{b})$  where  $\mathbf{W} = (W_i \in \mathbb{R}^{n_i \times n_{i-1}})_{i=1}^L$  are the weights and  $\mathbf{b} = (b_i \in \mathbb{R}^{n_i})_{i=1}^L$  are the biases. However, in this appendix we adopt different notation. Observe that, placing each bias vector as a extra column on the left of the weight matrix, we obtain matrices:

$$A_i = [b_i \ W_i] \in \mathbb{R}^{n_i \times (1+n_{i-1})}.$$

Thus, there is an isomorphism:

$$\text{Param}(\mathbf{n}) \simeq \bigoplus_{i=1}^L \mathbb{R}^{n_i \times (n_{i-1}+1)} = \mathbb{R}^{n_1 \times (n_0+1)} \times \mathbb{R}^{n_2 \times (n_1+1)} \times \dots \times \mathbb{R}^{n_L \times (n_{L-1}+1)}$$

In this appendix, we regard an element of  $\text{Param}(\mathbf{n})$  as a tuple of ‘merged’ matrices  $\mathbf{A} = (A_i \in \mathbb{R}^{n_i \times (1+n_{i-1})})_{i=1}^L$ . We now define convenient maps to translate between the merged notation and the split notation. For each  $i$ , define the extension-by-one map from  $\mathbb{R}^{n_i}$  to  $\mathbb{R} \times \mathbb{R}^{n_i} \simeq \mathbb{R}^{n_i+1}$  as follows:

$$\text{ext}_i : \mathbb{R}^{n_i} \rightarrow \mathbb{R}^{n_i+1} \quad v = (v_1, v_2, \dots, v_{n_i}) \mapsto (1, v_1, v_2, \dots, v_{n_i}) \quad (\text{D.2})$$

Observe that, for any  $i$  and  $x \in \mathbb{R}^{n_{i-1}}$ , we have

$$A_i \circ \text{ext}_{i-1}(x) = W_i x + b_i.$$

Consequently, the  $i$ -th partial feedforward function can be defined recursively as:

$$F_i = \rho_i \circ A_i \circ \text{ext}_{i-1} \circ F_{i-1} \quad (\text{D.3})$$

where  $\rho_i : \mathbb{R}^{n_i} \rightarrow \mathbb{R}^{n_i}$  is the activation<sup>5</sup> at the  $i$ -th layer, and  $F_0$  is the identity on  $\mathbb{R}^{n_0}$ .

### D.2.2 ORTHOGONAL CHANGE-OF-BASIS ACTION

To describe the orthogonal change-of-basis symmetries of the parameter space in the merged notation, recall the following product of orthogonal groups, with sizes corresponding to the widths of the hidden layers:

$$O(\mathbf{n}^{\text{hid}}) = O(n_1) \times O(n_2) \times \dots \times O(n_{L-1})$$

<sup>5</sup>In this general formulation,  $\rho_i$  can be any piece-wise differentiable function; for most of the rest of the paper we will be interested in the case where  $\rho_i$  is a radial rescaling function.

In the merged notation, the element  $\mathbf{Q} = (Q_i)_{i=1}^{L-1} \in O(\mathbf{n}^{\text{hid}})$  transforms  $\mathbf{A} \in \text{Param}(\mathbf{n})$  as:

$$\mathbf{A} \mapsto \mathbf{Q} \cdot \mathbf{A} := \left( Q_i \circ A_i \circ \begin{bmatrix} 1 & 0 \\ 0 & Q_{i-1}^{-1} \end{bmatrix} \right)_{i=1}^L \quad (\text{D.4})$$

where  $Q_0 = \text{id}_{n_0}$  and  $Q_L = \text{id}_{n_L}$ .

### D.2.3 MODEL COMPRESSION ALGORITHM

We now restate Algorithm 1 in the merged notation. We emphasize that Algorithms 1 and 2 are mathematically equivalent; the later simply uses more compact notation.

---

#### Algorithm 2: QR Model Compression (QR-compress)

---

```

input   :  $\mathbf{A} \in \text{Param}(\mathbf{n})$ 
output :  $\mathbf{Q} \in O(\mathbf{n}^{\text{hidden}})$  and  $\mathbf{V} \in \text{Param}(\mathbf{n}^{\text{red}})$ 

 $\mathbf{Q}, \mathbf{V} \leftarrow [], []$  // initialize output matrix lists
 $M_1 \leftarrow A_1$ 
for  $i \leftarrow 1$  to  $L - 1$  do // iterate through layers
     $Q_i, R_i \leftarrow \text{QR-decomp}(M_i, \text{mode} = \text{'complete'})$  //  $M_i = Q_i \circ \text{inc}_i \circ R_i$ 
    Append  $Q_i$  to  $\mathbf{Q}$ 
    Append  $R_i$  to  $\mathbf{V}$  // reduced merged weights for layer  $i$ 
    Set  $M_{i+1} \leftarrow A_{i+1} \circ \begin{bmatrix} 1 & 0 \\ 0 & Q_i \circ \text{inc}_i \end{bmatrix}$  // transform next layer
end
Append  $M_L$  to  $\mathbf{V}$ 
return  $\mathbf{Q}, \mathbf{V}$ 

```

---

We explain the notation. As noted in Appendix B.1, the symbol ‘ $\circ$ ’ denotes composition of maps, or matrix multiplication in the case of linear maps. The standard inclusion  $\text{inc}_i : \mathbb{R}^{n_i^{\text{red}}} \hookrightarrow \mathbb{R}^{n_i}$  maps into the first  $n_i^{\text{red}}$  coordinates. As a matrix,  $\text{Inc}_i \in \mathbb{R}^{n_i \times n_i^{\text{red}}}$  has ones along the main diagonal and zeros elsewhere. The method QR-decomp with mode = ‘complete’ computes the complete QR decomposition of the  $n_i \times (1 + n_{i-1}^{\text{red}})$  matrix  $M_i$  as  $Q_i \circ \text{inc}_i \circ R_i$  where  $Q_i \in O(n_i)$  and  $R_i$  is upper-triangular of size  $n_i^{\text{red}} \times (1 + n_{i-1}^{\text{red}})$ . The definition of  $n_i^{\text{red}}$  implies that either  $n_i^{\text{red}} = n_{i-1}^{\text{red}} + 1$  or  $n_i^{\text{red}} = n_i$ . The matrix  $R_i$  is of size  $n_i^{\text{red}} \times n_i^{\text{red}}$  in the former case and of size  $n_i \times (1 + n_{i-1}^{\text{red}})$  in the latter case.

### D.2.4 GRADIENT DESCENT DEFINITIONS

As in Section 6, we fix:

- a widths vector  $\mathbf{n} = (n_0, n_1, \dots, n_L)$ .
- a tuple  $\boldsymbol{\rho} = (\rho_1, \dots, \rho_L)$  of radial rescaling activations, where  $\rho_i : \mathbb{R}^{n_i} \rightarrow \mathbb{R}^{n_i}$  for  $i = 1, \dots, L$ .
- a batch of training data  $\{(x_j, y_j)\} \subseteq \mathbb{R}^{n_0} \times \mathbb{R}^{n_L} = \mathbb{R}^{n_0^{\text{red}}} \times \mathbb{R}^{n_L^{\text{red}}}$ .
- a cost function  $\mathcal{C} : \mathbb{R}^{n_L} \times \mathbb{R}^{n_L} \rightarrow \mathbb{R}$

As a result, we have a loss function on  $\text{Param}(\mathbf{n})$ :

$$\mathcal{L} : \text{Param}(\mathbf{n}) \rightarrow \mathbb{R} \quad \mathcal{L}(\mathbf{A}) = \sum \mathcal{C}(F_{(\mathbf{A}, \boldsymbol{\rho})}(x_j), y_j)$$

where  $F_{(\mathbf{A}, \boldsymbol{\rho})}$  is the feedforward of the radial neural network with (merged) parameters  $\mathbf{A}$  and activations  $\boldsymbol{\rho}$ . We emphasize that the loss function  $\mathcal{L}$  depends on the batch of training data chosen above; however, for clarity, we omit extra notation indicating this dependency since the batch of training data is fixed throughout this discussion. Similarly, we have:

- the reduced widths vector  $\mathbf{n}^{\text{red}} = (n_0^{\text{red}}, n_1^{\text{red}}, \dots, n_L^{\text{red}})$ .

- the restrictions  $\boldsymbol{\rho}^{\text{red}} = (\rho_1^{\text{red}}, \dots, \rho_L^{\text{red}})$ , where  $\rho_i^{\text{red}} : \mathbb{R}^{n_i^{\text{red}}} \rightarrow \mathbb{R}^{n_i^{\text{red}}}$  for  $i = 1, \dots, L$ .

Using the fact that  $n_0^{\text{red}} = n_0$  and  $n_L^{\text{red}} = n_L$ , there is a loss function on  $\text{Param}(\mathbf{n}^{\text{red}})$ :

$$\mathcal{L}_{\text{red}} : \text{Param}(\mathbf{n}^{\text{red}}) \rightarrow \mathbb{R} \quad \mathcal{L}_{\text{red}}(\mathbf{B}) = \sum \mathcal{C}(F_{(\mathbf{B}, \boldsymbol{\rho}^{\text{red}})}(x_j), y_j)$$

where  $F_{(\mathbf{B}, \boldsymbol{\rho}^{\text{red}})}$  is the feedforward of the radial neural network with parameters  $\mathbf{B} \in \text{Param}(\mathbf{n}^{\text{red}})$  and activations  $\boldsymbol{\rho}^{\text{red}}$ . (Again, technically speaking, the loss function  $\mathcal{L}_{\text{red}}$  depends on the batch of training data fixed above.) For any learning rate  $\eta > 0$ , we obtain a gradient descent maps:

$$\begin{aligned} \gamma : \text{Param}(\mathbf{n}) &\rightarrow \text{Param}(\mathbf{n}) & \gamma_{\text{red}} : \text{Param}(\mathbf{n}^{\text{red}}) &\rightarrow \text{Param}(\mathbf{n}^{\text{red}}) \\ \mathbf{A} &\mapsto \mathbf{A} - \eta \nabla_{\mathbf{A}} \mathcal{L} & \mathbf{B} &\mapsto \mathbf{B} - \eta \nabla_{\mathbf{B}} \mathcal{L}_{\text{red}} \end{aligned}$$

### D.3 THE INTERPOLATING SPACE

In this section, we introduce a subspace  $\text{Param}^{\text{int}}(\mathbf{n})$  of  $\text{Param}(\mathbf{n})$ , that, as we will later see, interpolates between  $\text{Param}(\mathbf{n})$  and  $\text{Param}(\mathbf{n}^{\text{red}})$ .

Let  $\text{Param}^{\text{int}}(\mathbf{n})$  denote the subspace of  $\text{Param}(\mathbf{n})$  consisting of those  $\mathbf{T} = (T_1, \dots, T_L) \in \text{Param}(\mathbf{n})$  for which the bottom left  $(n_i - n_i^{\text{red}}) \times (1 + n_{i-1}^{\text{red}})$  block of  $T_i$  is zero for each  $i$ . Schematically:

$$T_i = \begin{bmatrix} * & * \\ 0 & * \end{bmatrix}$$

where the rows are divided as  $n_i^{\text{red}}$  on top and  $n_i - n_i^{\text{red}}$  on the bottom, while the columns are divided as  $(1 + n_{i-1}^{\text{red}})$  on the left and  $n_{i-1} - n_{i-1}^{\text{red}}$  on the right. Let

$$\iota_1 : \text{Param}^{\text{int}}(\mathbf{n}) \hookrightarrow \text{Param}(\mathbf{n})$$

be the inclusion. The following proposition follows from an elementary analysis of the workings of Algorithm 2 (or, equivalently, Algorithm 1).

**Proposition 23.** *Let  $\mathbf{A} \in \text{Param}(\mathbf{n})$  and let  $\mathbf{Q} \in O(\mathbf{n}^{\text{hid}})$  be the tuple of orthogonal matrices produced by Algorithm 2. Then  $\mathbf{Q}^{-1} \cdot \mathbf{A}$  belongs to  $\text{Param}^{\text{int}}(\mathbf{n})$ .*

Define a map

$$q_1 : \text{Param}(\mathbf{n}) \rightarrow \text{Param}^{\text{int}}(\mathbf{n})$$

by taking  $\mathbf{A} \in \text{Param}(\mathbf{n})$  and zeroing out the bottom left  $(n_i - n_i^{\text{red}}) \times (1 + n_{i-1}^{\text{red}})$  block of  $A_i$  for each  $i$ . Schematically:

$$\mathbf{A} = \left( A_i = \begin{bmatrix} * & * \\ * & * \end{bmatrix} \right)_{i=1}^L \mapsto q_1(\mathbf{A}) = \left( \begin{bmatrix} * & * \\ 0 & * \end{bmatrix} \right)_{i=1}^L$$

It is straightforward to check that  $q_1$  is a well-defined, surjective linear map. The transpose of  $q_1$  is the inclusion  $\iota_1$ . We summarize the situation in the following diagram:

$$\text{Param}^{\text{int}}(\mathbf{n}) \begin{array}{c} \xrightarrow{\iota_1} \\ \xleftarrow{q_1} \end{array} \text{Param}(\mathbf{n}) \quad (\text{D.5})$$

We observe that the composition  $q_1 \circ \iota_1$  is the identity on  $\text{Param}^{\text{int}}(\mathbf{n})$ .

### D.4 PROJECTED GRADIENT DESCENT AND MODEL COMPRESSION

Recall from Section 6 that the *projected gradient descent* map on  $\text{Param}(\mathbf{n})$  is given by:

$$\gamma_{\text{proj}} : \text{Param}(\mathbf{n}) \rightarrow \text{Param}(\mathbf{n}), \quad \mathbf{A} \mapsto \text{Proj}(\mathbf{A} - \eta \nabla_{\mathbf{A}} \mathcal{L})$$

where  $\mathbf{A} = (\mathbf{W}, \mathbf{b})$  are the merged parameters (Appendix D.2), and, in the notation of the previous section, the map  $\text{Proj}$  is  $\iota_1 \circ q_1$ . To reiterate, while all entries of each weight matrix and each bias vector contribute to the computation of the gradient  $\nabla_{\mathbf{A}} \mathcal{L} = \nabla_{(\mathbf{W}, \mathbf{b})} \mathcal{L}$ , only those not in the bottom left submatrix get updated under the projected gradient descent map  $\gamma_{\text{proj}}$ .

Let  $\mathbf{V}, \mathbf{Q} = \text{QR-Compress}(\mathbf{A})$  be the outputs of Algorithm 2 (which is equivalent to Algorithm 1), so that  $\mathbf{V} = (\mathbf{W}^{\text{red}}, \mathbf{b}^{\text{red}}) \in \text{Param}(\mathbf{n}^{\text{red}})$  are the parameters of the compressed model corresponding to the full model with merged parameters  $\mathbf{A} = (\mathbf{W}, \mathbf{b})$ , and  $\mathbf{Q} \in O(\mathbf{n}^{\text{hid}})$  is an orthogonal change-of-basis symmetry of the parameter space. Moreover, set  $\mathbf{T} = \mathbf{Q}^{-1} \cdot \mathbf{A} \in \text{Param}^{\text{int}}(\mathbf{n})$ , where we use the change-of-basis action from Appendix D.2 and Proposition 23. We have the following rephrasing of Theorem 8.

**Theorem 24** (Theorem 8). *Let  $\mathbf{A} \in \text{Param}(\mathbf{n})$ , and let  $\mathbf{V}, \mathbf{Q}, \mathbf{T}$  be as above. For any  $k \geq 0$ :*

1.  $\gamma^k(\mathbf{A}) = \mathbf{Q} \cdot \gamma^k(\mathbf{T})$
2.  $\gamma_{\text{proj}}^k(\mathbf{T}) = \gamma_{\text{red}}^k(\mathbf{V}) + \mathbf{T} - \mathbf{V}$ .

More precisely, the second equality is  $\gamma_{\text{proj}}^k(\mathbf{T}) = \iota(\gamma_{\text{red}}^k(\mathbf{V})) + \mathbf{T} - \iota(\mathbf{V})$  where  $\iota : \text{Param}(\mathbf{n}^{\text{red}}) \hookrightarrow \text{Param}(\mathbf{n})$  is the inclusion into the top left corner in each coordinate. Also, in the statement of Theorem 8, we have  $\mathbf{U} = \mathbf{T} - \mathbf{V}$ .

We summarize this result in the following diagram. The left horizontal maps indicate the addition of  $\mathbf{U} = \mathbf{T} - \mathbf{V}$ , the right horizontal arrows indicate the action of  $\mathbf{Q}$ , and the vertical maps are various versions of gradient descent. The shaded regions indicate the (smallest) vector space to which the various representations naturally belong.

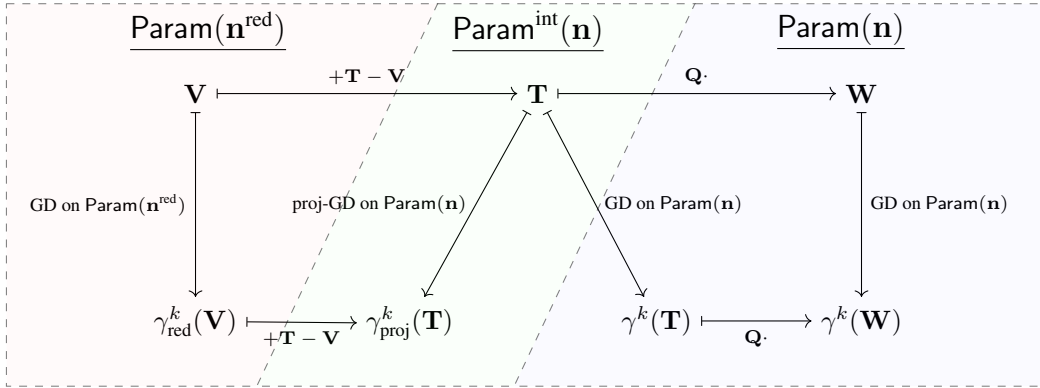

#### D.5 PROOF OF THEOREM 8

We begin by explaining the sense in which  $\text{Param}^{\text{int}}(\mathbf{n})$  interpolates between  $\text{Param}(\mathbf{n})$  and  $\text{Param}(\mathbf{n}^{\text{red}})$ . One extends Diagram D.5 as follows:

$$\text{Param}(\mathbf{n}^{\text{red}}) \xrightleftharpoons[q_2]{\iota_2} \text{Param}^{\text{int}}(\mathbf{n}) \xrightleftharpoons[q_1]{\iota_1} \text{Param}(\mathbf{n})$$

- The map

$$\iota_2 : \text{Param}(\mathbf{n}^{\text{red}}) \hookrightarrow \text{Param}^{\text{int}}(\mathbf{n})$$

takes  $\mathbf{B} = (B_i) \in \text{Param}(\mathbf{n}^{\text{red}})$  and pad each matrix with  $n_i - n_i^{\text{red}}$  rows of zeros on the bottom and  $n_{i-1} - n_{i-1}^{\text{red}}$  columns of zeros on the right:

$$\mathbf{B} = (B_i)_{i=1}^L \mapsto \iota_2(\mathbf{B}) = \left( \begin{bmatrix} B_i & 0 \\ 0 & 0 \end{bmatrix} \right)_{i=1}^L$$

It is straightforward to check that  $\iota_2$  is a well-defined injective linear map.

- The map

$$q_2 : \text{Param}^{\text{int}}(\mathbf{n}) \rightarrow \text{Param}(\mathbf{n}^{\text{red}})$$



extracts from  $\mathbf{T}$  the top left  $n_i^{\text{red}} \times (1 + n_{i-1}^{\text{red}})$  matrix:

$$\mathbf{T} = \left( T_i = \begin{bmatrix} T_i^{(1)} & T_i^{(2)} \\ 0 & T_i^{(4)} \end{bmatrix} \right)_{i=1}^L \mapsto q_2(\mathbf{T}) = \left( T_i^{(1)} \right)_{i=1}^L$$

It is straightforward to check that  $q_2$  is a surjective linear map. The transpose of  $q_2$  is the inclusion  $\iota_2$ .

**Lemma 25.** *We have the following:*

1. *The inclusion  $\iota : \text{Param}(\mathbf{n}^{\text{red}}) \hookrightarrow \text{Param}(\mathbf{n})$  coincides with the composition  $\iota_1 \circ \iota_2$ , and commutes with the loss functions:*

$$\begin{array}{ccc} \text{Param}(\mathbf{n}^{\text{red}}) & \xrightarrow{\iota_1 \circ \iota_2 = \iota} & \text{Param}(\mathbf{n}) \\ & \searrow \mathcal{L}_{\text{red}} & \swarrow \mathcal{L} \\ & \mathbb{R} & \end{array}$$

2. *The following diagram commutes:*

$$\begin{array}{ccc} \text{Param}^{\text{int}}(\mathbf{n}) & \xrightarrow{q_2} & \text{Param}(\mathbf{n}^{\text{red}}) \\ \downarrow \iota_1 & & \downarrow \mathcal{L}_{\text{red}} \\ \text{Param}(\mathbf{n}) & \xrightarrow{\mathcal{L}} & \mathbb{R} \end{array}$$

3. *For any  $\mathbf{T} \in \text{Param}^{\text{int}}(\mathbf{n})$ , we have:  $q_1(\nabla_{\iota_1(\mathbf{T})}\mathcal{L}) = \iota_2(\nabla_{q_2(\mathbf{T})}\mathcal{L}_{\text{red}})$ .*

*Proof.* We have the following standard inclusions into the first coordinates and projections onto the first coordinates, for  $i = 0, 1, \dots, L$ :

$$\begin{aligned} \text{inc}_i &= \text{inc}_{n_i^{\text{red}}, n_i} : \mathbb{R}^{n_i^{\text{red}}} \hookrightarrow \mathbb{R}^{n_i}, & \widetilde{\text{inc}}_i &= \text{inc}_{1+n_i^{\text{red}}, 1+n_i} : \mathbb{R}^{1+n_i^{\text{red}}} \hookrightarrow \mathbb{R}^{1+n_i}, \\ \pi_i &: \mathbb{R}^{n_i} \rightarrow \mathbb{R}^{n_i^{\text{red}}}, & \widetilde{\pi}_i &: \mathbb{R}^{1+n_i} \rightarrow \mathbb{R}^{1+n_i^{\text{red}}}. \end{aligned}$$

Observe that  $\text{Param}^{\text{int}}(\mathbf{n})$  is the subspace of  $\text{Param}(\mathbf{n})$  consisting of those  $\mathbf{T} = (T_1, \dots, T_L) \in \text{Param}(\mathbf{n})$  such that:

$$(\text{id}_{n_i} - \text{inc}_i \circ \pi_i) \circ T_i \circ \widetilde{\text{inc}}_{i-1} \circ \widetilde{\pi}_{i-1} = 0$$

for  $i = 1, \dots, L$ .

By the definition of radial rescaling functions, for each  $i = 1, \dots, L$ , there is a piece-wise differentiable function  $h_i : \mathbb{R} \rightarrow \mathbb{R}$  such that  $\rho_i = h_i^{(n_i)}$ . Note that  $\rho_i^{\text{red}} = h_i^{(n_i^{\text{red}})}$ , and  $h^{(n_i)} \circ \text{inc}_i = \text{inc}_i \circ h^{(n_i^{\text{red}})}$ .

The identity  $\iota = \iota_1 \circ \iota_2$  follows directly from definitions. To prove the commutativity of the first diagram, it is enough to show that, for any  $\mathbf{X}$  in  $\text{Param}(\mathbf{n}^{\text{red}})$ , the feedforward functions of  $\mathbf{X}$  and  $\iota(\mathbf{X})$  coincide. This follows easily from the fact that, for  $i = 1, \dots, L$ , we have:

$$\pi_i \circ h^{(n_i)} \circ \text{inc}_i = \pi_i \circ \text{inc}_i \circ h^{(n_i^{\text{red}})} = h^{(n_i^{\text{red}})}.$$

For the second claim, let  $\mathbf{T} \in \text{Param}^{\text{int}}(\mathbf{n})$ . It suffices to show that  $\iota_1(\mathbf{T})$  and  $q_2(\mathbf{T})$  have the same feedforward function. Recall the  $\text{ext}_i$  maps and the formulation of the feedforward function in the merged notation given in Equation [D.3](#). Using this set-up, the key computation is:

$$\begin{aligned} \text{inc}_i \circ h^{(n_i^{\text{red}})} \circ \pi_i \circ T_i \circ \text{ext}_{n_{i-1}} \circ \text{inc}_{i-1} &= h^{(n_i)} \circ \text{inc}_i \circ \pi_i \circ T_i \circ \widetilde{\text{inc}}_{i-1} \circ \text{ext}_{n_{i-1}} \\ &= h^{(n_i)} \circ T_i \circ \widetilde{\text{inc}}_{i-1} \circ \text{ext}_{n_{i-1}} \\ &= h^{(n_i)} \circ T_i \circ \text{ext}_{n_{i-1}} \circ \text{inc}_{i-1} \end{aligned}$$

which uses the fact that  $(\text{id}_{n_i} - \text{inc}_i \circ \pi_i) \circ T_i \circ \widetilde{\text{inc}}_{i-1} = 0$ , or, equivalently,  $\text{inc}_i \circ \pi_i \circ T_i \circ \widetilde{\text{inc}}_{i-1} = T_i \circ \widetilde{\text{inc}}_{i-1}$ , as well as the fact that  $\text{ext}_i \circ \text{inc}_i = \widetilde{\text{inc}}_i \circ \text{ext}_i$ . Applying this relation successively starting with the second-to-last layer ( $i = L - 1$ ) and ending in the first ( $i = 1$ ), one obtains the result. For the last claim, one computes  $\nabla_{\mathbf{T}}(\mathcal{L} \circ \iota_1)$  in two different ways. The first way is:

$$\begin{aligned}\nabla_{\mathbf{T}}(\mathcal{L} \circ \iota_1) &= (d(\mathcal{L}_{\mathbf{T}} \circ \iota_1))^T = (d\mathcal{L}_{\iota_1(\mathbf{T})} \circ d\mathbf{T}\iota_1)^T = (d\mathcal{L}_{\iota_1(\mathbf{T})} \circ \iota_1)^T \\ &= \iota_1^T \left( d\mathcal{L}_{\iota_1(\mathbf{T})}^T \right) = q_1 \left( \nabla_{\iota_1(\mathbf{T})} \mathcal{L} \right)\end{aligned}$$

where we use the fact that  $\iota_1$  is a linear map whose transpose is  $q_1$ . The second way uses the commutative diagram of the second part of the Lemma:

$$\begin{aligned}\nabla_{\mathbf{T}}(\mathcal{L} \circ \iota_1) &= \nabla_{\mathbf{T}}(\mathcal{L}_{\text{red}} \circ q_2) = (d(\mathcal{L}_{\text{red}})_{\mathbf{T}} \circ q_2)^T = \left( d(\mathcal{L}_{\text{red}})_{q_2(\mathbf{T})} \circ d(q_2)_{\mathbf{Z}} \right)^T \\ &= \left( d(\mathcal{L}_{\text{red}})_{q_2(\mathbf{T})} \circ q_2 \right)^T = q_2^T \left( d(\mathcal{L}_{\text{red}})_{q_2(\mathbf{T})}^T \right) = \iota_2 \left( \nabla_{q_2(\mathbf{T})} \mathcal{L}_{\text{red}} \right).\end{aligned}$$

We also use the fact that  $q_2$  is a linear map whose transpose is  $\iota_2$ .  $\square$

*Proof of Theorem 8* As above, let  $\mathbf{R}, \mathbf{Q} = \text{QR-compress}(\mathbf{A})$  be the outputs of Algorithm 1, so that  $\mathbf{V} = (\mathbf{W}^{\text{red}}, \mathbf{b}^{\text{red}}) \in \text{Param}(\mathbf{n}^{\text{red}})$  is the dimensional reduction of the merged parameters  $\mathbf{A} = (\mathbf{W}, \mathbf{b})$ , and  $\mathbf{Q} \in O(\mathbf{n}^{\text{hid}})$ . Set  $\mathbf{T} = \mathbf{Q}^{-1} \cdot \mathbf{A} \in \text{Param}^{\text{int}}(\mathbf{n})$ .

The action of  $\mathbf{Q} \in O(\mathbf{n}^{\text{hid}})$  on  $\text{Param}(\mathbf{n})$  is an orthogonal transformation, so the first claim follows from Lemma 22.

For the second claim, it suffices to consider the case  $\eta = 1$ . The general case follows similarly. We proceed by induction. The base case  $k = 0$  amounts to Theorem 6. For the induction step, we set

$$\mathbf{Z}^{(k)} = \iota(\gamma_{\text{red}}^k(\mathbf{V})) + \mathbf{T} - \iota(\mathbf{V}).$$

Each  $\mathbf{Z}^{(k)}$  belongs to  $\text{Param}^{\text{int}}(\mathbf{n})$ , so  $i_1(\mathbf{Z}^{(k)}) = \mathbf{Z}^{(k)}$ . Moreover,  $q_2(\mathbf{Z}^{(k)}) = \gamma_{\text{red}}^k(\mathbf{V})$ . We compute:

$$\begin{aligned}\gamma_{\text{proj}}^{k+1}(\mathbf{Q}^{-1} \cdot \mathbf{A}) &= \gamma_{\text{proj}}(\gamma_{\text{proj}}^k(\mathbf{Q}^{-1} \cdot \mathbf{A})) \\ &= \gamma_{\text{proj}}(\iota(\gamma_{\text{red}}^k(\mathbf{V})) + \mathbf{T} - \iota(\mathbf{V})) \\ &= \iota_1 \circ q_1 \left( \iota(\gamma_{\text{red}}^k(\mathbf{V})) + \mathbf{T} - \iota(\mathbf{V}) - \nabla_{\iota(\gamma_{\text{red}}^k(\mathbf{V})) + \mathbf{T} - \iota(\mathbf{V})} \mathcal{L} \right) \\ &= \iota(\gamma_{\text{red}}^k(\mathbf{V})) - \iota_1 \circ q_1 \left( \nabla_{\iota_1(\mathbf{Z}^{(k)})} \mathcal{L} \right) + \mathbf{T} - \iota(\mathbf{V}) \\ &= \iota(\gamma_{\text{red}}^k(\mathbf{V})) - \iota_1 \circ \iota_2 \left( \nabla_{q_2(\mathbf{Z}^{(k)})} \mathcal{L}_{\text{red}} \right) + \mathbf{T} - \iota(\mathbf{V}) \\ &= \iota \left( \gamma_{\text{red}}^k(\mathbf{V}) - \nabla_{\gamma_{\text{red}}^k(\mathbf{V})} \mathcal{L}_{\text{red}} \right) + \mathbf{T} - \iota(\mathbf{V}) \\ &= \iota(\gamma_{\text{red}}^{k+1}(\mathbf{V})) + \mathbf{T} - \iota(\mathbf{V})\end{aligned}$$

where the second equality uses the induction hypothesis; the third invokes the definition of  $\gamma_{\text{proj}}$ ; the fourth uses the fact that  $\mathbf{Z}^{(k)} = \iota(\gamma_{\text{red}}^k(\mathbf{V})) + \mathbf{T} - \iota(\mathbf{V})$  belongs to  $\text{Param}^{\text{int}}(\mathbf{n})$ ; the fifth and sixth use Lemma 25 above; and the last uses the definition of  $\gamma_{\text{red}}$ .  $\square$

## D.6 EXAMPLE

We now discuss an example where projected gradient descent does not match usual gradient descent.

Let  $\mathbf{n} = (1, 3, 1)$  be a widths vector. The space of parameters with this widths vector is 10-dimensional:

$$\text{Param}(\mathbf{n}) = \text{Hom}(\mathbb{R}^2, \mathbb{R}^3) \oplus \text{Hom}(\mathbb{R}^4, \mathbb{R}) \simeq \mathbb{R}^{10}.$$

We identify a choice of parameters (in the merged notation)

$$\mathbf{A} = \left( A_1 = \begin{bmatrix} a & b \\ c & d \\ e & f \end{bmatrix}, A_2 = [g \quad h \quad i \quad j] \right) \in \text{Param}((1, 3, 1)) \quad (\text{D.6})$$

with the point  $p = (a, b, c, d, e, f, g, h, i, j)$  in  $\mathbb{R}^{10}$ . To be even more explicit, the weights for the first layer are  $W_1 = \begin{bmatrix} b \\ d \\ f \end{bmatrix}$ , the bias in the first hidden layer is  $b_1 = (a, c, e)$ , the weights for the second layer are  $W_2 = [h \ i \ j]$ , and the bias for the output layer is  $b_2 = g$ .

The action of the orthogonal group  $O(\mathbf{n}) = O(3)$  on  $\text{Param}(\mathbf{n}) \simeq \mathbb{R}^{10}$  can be expressed as:

$$Q \mapsto \begin{bmatrix} Q & 0 & 0 & 0 \\ 0 & Q & 0 & 0 \\ 0 & 0 & 1 & 0 \\ 0 & 0 & 0 & Q \end{bmatrix},$$

where the rows and columns are divided according to the partition  $3 + 3 + 1 + 3 = 10$ . Consider the function<sup>6</sup>:

$$\begin{aligned} \mathcal{L} : \text{Param}(\mathbf{n}) &\rightarrow \mathbb{R} \\ p = (a, b, c, d, e, f, g, h, i, j) &\mapsto h(a + b) + i(c + d) + j(e + f) + g \end{aligned}$$

By the product rule, we have:

$$\nabla_p \mathcal{L} = (h, h, i, i, j, j, 1, a + b, c + d, e + f)$$

One easily checks that  $\mathcal{L}(Q \cdot p) = \mathcal{L}(p)$  and that  $\nabla_{Q \cdot p} \mathcal{L} = Q \cdot \nabla_p \mathcal{L}$  for any  $Q \in O(3)$ .

The interpolating space is the eight-dimensional subspace of  $\text{Param}(\mathbf{n}) \simeq \mathbb{R}^{10}$  with  $e = f = 0$  (using the notation of Equation D.6). Suppose  $p' = (a, b, c, d, 0, 0, g, h, i, j)$  belongs to the interpolating space. Then the gradient is

$$\nabla_{p'} \mathcal{L} = (h, h, i, i, j, j, 1, a + b, c + d, 0)$$

which does not belong to the interpolating space. So one step of usual gradient descent, with learning rate  $\eta > 0$  yields:

$$\begin{aligned} \gamma : p' &= (a, b, c, d, 0, 0, g, h, i, j) \mapsto \\ &(a - \eta h, b - \eta h, c - \eta i, d - \eta i, -\eta j, -\eta j, g - \eta, h - \eta(a + b), i - \eta(c + d), j) \end{aligned}$$

On the other hand, one step of projected gradient descent yields:

$$\begin{aligned} \gamma_{\text{proj}} : p' &= (a, b, c, d, 0, 0, g, h, i, j) \mapsto \\ &(a - \eta h, b - \eta h, c - \eta i, d - \eta i, 0, 0, g - \eta, h - \eta(a + b), i - \eta(c + d), j) \end{aligned}$$

Direct computation shows that the difference between the evaluation of  $\mathcal{L}$  after one step of gradient descent and the evaluation of  $\mathcal{L}$  after one step of projected gradient descent is:

$$\mathcal{L}(\gamma(p')) - \mathcal{L}(\gamma_{\text{proj}}(p')) = 2\eta j^2.$$

## E EXPERIMENTS

As mentioned in Section 7, we provide an implementation of Algorithm 1 in order to (1) empirically validate that our implementation satisfies the claims of Theorems 6 and Theorem 8 and (2) quantify real-world performance. Our implementation uses a generalization of radial neural networks, which we explain presently.

### E.1 RADIAL NEURAL NETWORKS WITH SHIFTS

In this section, we consider radial neural networks with an extra trainable parameter in each layer that shifts the radial rescaling activation. Adding such parameters allows for more flexibility in the model, and (as shown in Theorem 26) the model compression of Theorem 6 holds for such networks. It is this generalization that we use in our experiments.

<sup>6</sup>For  $\mathbf{A} \in \text{Param}(\mathbf{n})$ , the neural function of the neural network with affine maps determined by  $\mathbf{A}$  and identity activation functions is  $\mathbb{R} \rightarrow \mathbb{R}; x \mapsto \mathcal{L}(\mathbf{W})x$ . The function  $\mathcal{L}$  can appear as a loss function for certain batches of training data and cost function on  $\mathbb{R}$ .

Let  $h : \mathbb{R} \rightarrow \mathbb{R}$  be a function. For any  $n \geq 1$  and any  $t \in \mathbb{R}$ , the corresponding *shifted radial rescaling function* on  $\mathbb{R}^n$  is given by:

$$\rho = h^{(n,t)} : v \mapsto \frac{h(|v| - t)}{|v|}v$$

if  $v \neq 0$  and  $\rho(0) = 0$ . A *radial neural network with shifts* consists of the following data:

1. Hyperparameters: A positive integer  $L$  and a widths vector  $\mathbf{n} = (n_0, n_1, n_2, \dots, n_L)$ .
2. Trainable parameters:
  - (a) A choice of weights and biases  $(\mathbf{W}, \mathbf{b}) \in \text{Param}(\mathbf{n})$ .
  - (b) A vector of shifts  $\mathbf{t} = (t_1, t_2, \dots, t_L) \in \mathbb{R}^L$ .
3. Activations: A tuple  $\mathbf{h} = (h_1, \dots, h_L)$  of piecewise differentiable functions  $\mathbb{R} \rightarrow \mathbb{R}$ . Together with the shifts, we have the shifted radial rescaling activation  $\rho_i = h_i^{(n_i, t_i)} : \mathbb{R}^{n_i} \rightarrow \mathbb{R}^{n_i}$  in each layer.

The *feedforward function* of a radial neural network with shifts is defined in the usual recursive way, as in Section 3. The trainable parameters form the vector space  $\text{Param}(\mathbf{n}) \times \mathbb{R}^L$ , and the loss function of a batch of training data  $\{(x_i, y_i)\} \subset \mathbb{R}^{n_0} \times \mathbb{R}^{n_L}$  is defined as

$$\mathcal{L} : \text{Param}(\mathbf{n}) \times \mathbb{R}^L \longrightarrow \mathbb{R}; \quad (\mathbf{W}, \mathbf{t}) \mapsto \sum_j \mathcal{C}(F_{(\mathbf{W}, \mathbf{b}, \mathbf{t}, \mathbf{h})}(x_j), y_j)$$

where  $F_{(\mathbf{W}, \mathbf{b}, \mathbf{t}, \mathbf{h})}$  is the feedforward function of a radial neural network with weights  $\mathbf{W}$ , biases  $\mathbf{b}$ , shifts  $\mathbf{t}$ , and radial rescaling activations produced from  $\mathbf{h}$ . We have the gradient descent map:

$$\gamma : \text{Param}(\mathbf{n}) \times \mathbb{R}^L \longrightarrow \text{Param}(\mathbf{n}) \times \mathbb{R}^L$$

which updates the entries of  $\mathbf{W}$ ,  $\mathbf{b}$ , and  $\mathbf{t}$ . The group  $O(\mathbf{n}^{\text{hid}}) = O(n_1) \times \dots \times O(n_{L-1})$  acts on  $\text{Param}(\mathbf{n})$  as usual (see Section 5.1), and on  $\mathbb{R}^L$  trivially. The neural function is unchanged by this action. We conclude that the  $O(\mathbf{n}^{\text{hid}})$  action on  $\text{Param}(\mathbf{n}) \times \mathbb{R}^L$  commutes with gradient descent  $\gamma$ . We now state a generalization of Theorem 6 for the case of radial neural networks with shifts. We omit a proof, as it uses the same techniques as the proof of Theorem 6.

**Theorem 26.** *Let  $(\mathbf{W}, \mathbf{b}, \mathbf{t}, \mathbf{h})$  be a radial neural network with shifts and widths vector  $\mathbf{n}$ . Let  $\mathbf{W}^{\text{red}}$  and  $\mathbf{b}^{\text{red}}$  be the weights and biases of the compressed network produced by Algorithm 1. The feedforward function of the original network  $(\mathbf{W}, \mathbf{b}, \mathbf{t}, \mathbf{h})$  coincides with that of the compressed network  $(\mathbf{W}^{\text{red}}, \mathbf{b}^{\text{red}}, \mathbf{t}, \mathbf{h})$ .*

Theorem 8 also generalizes to the setting of radial neural networks with shifts, using projected gradient descent with respect to the subspace  $\text{Param}^{\text{int}}(\mathbf{n}) \times \mathbb{R}^L$  of  $\text{Param}(\mathbf{n}) \times \mathbb{R}^L$ .

## E.2 IMPLEMENTATION DETAILS

Our implementation is written in Python and uses the QR decomposition routine in NumPy (Harris et al. (2020)). We also implement a general class RadNet for radial neural networks using PyTorch (Paszke et al. (2019)). For brevity, we write  $\hat{\mathbf{W}}$  for  $(\mathbf{W}, \mathbf{b})$  and  $\hat{\mathbf{W}}^{\text{red}}$  for  $(\mathbf{W}^{\text{red}}, \mathbf{b}^{\text{red}})$ .

**(1) Empirical verification of Theorem 6.** We use synthetic data to learn the function  $f(x) = e^{-x^2}$  with  $N = 121$  samples  $x_j = -3 + j/20$  for  $0 \leq j < 121$ . We model  $f_{\hat{\mathbf{W}}}$  as a radial neural network with widths  $\mathbf{n} = (1, 6, 7, 1)$  and activation the radial shifted sigmoid  $h(x) = 1/(1 + e^{-x+s})$ . Applying QR-compress gives a radial neural network  $f_{\hat{\mathbf{W}}^{\text{red}}}$  with widths  $\mathbf{n}^{\text{red}} = (1, 2, 3, 1)$ . Theorem 6 implies that the neural functions of  $f_{\hat{\mathbf{W}}}$  and  $f_{\hat{\mathbf{W}}^{\text{red}}}$  are equal. Over 10 random initializations of  $\hat{\mathbf{W}}$ , the mean absolute error  $(1/N) \sum_j |f_{\hat{\mathbf{W}}}(x_j) - f_{\hat{\mathbf{W}}^{\text{red}}}(x_j)| = 1.31 \cdot 10^{-8} \pm 4.45 \cdot 10^{-9}$ . Thus  $f_{\hat{\mathbf{W}}}$  and  $f_{\hat{\mathbf{W}}^{\text{red}}}$  agree up to machine precision.

**(2) Empirical verification of Theorem 8.** Adopting the notation from above, the claim is that training  $f_{\mathbf{Q}^{-1}, \hat{\mathbf{W}}}$  with objective  $\mathcal{L}$  by projected gradient descent coincides with training  $f_{\hat{\mathbf{W}}^{\text{red}}}$  with objective  $\mathcal{L}_{\text{red}}$  by usual gradient descent. We verified this on synthetic data using 3000 epochs at learning rate 0.01. Over 10 random initializations of  $\hat{\mathbf{W}}$ , the loss functions match up to machine precision with  $|\mathcal{L} - \mathcal{L}_{\text{red}}| = 4.02 \cdot 10^{-9} \pm 7.01 \cdot 10^{-9}$ .

**(3) Reduced model trains faster.** Due to the relation between projected gradient descent of the full network  $\tilde{\mathbf{W}}$  and gradient descent of the reduced network  $\tilde{\mathbf{W}}^{\text{red}}$ , our method may be applied before training to produce a smaller model class which *trains* faster without sacrificing accuracy. We test this hypothesis in learning the function  $f : \mathbb{R}^2 \rightarrow \mathbb{R}^2$  sending  $x = (t_1, t_2)$  to  $(e^{-t_1^2}, e^{-t_2^2})$  using  $N = 121^2$  samples  $(-3 + j/20, -3 + k/20)$  for  $0 \leq j, k < 121$ . We model  $f_{\tilde{\mathbf{W}}}$  as a radial neural network with layer widths  $\mathbf{n} = (2, 16, 64, 128, 16, 2)$  and activation the radial sigmoid  $h(r) = 1/(1 + e^{-r})$ . Applying QR-compress gives a radial neural network  $f_{\tilde{\mathbf{W}}^{\text{red}}}$  with widths  $\mathbf{n}^{\text{red}} = (2, 3, 4, 5, 6, 2)$ . We trained both models until the training loss was  $\leq 0.01$ . Running on a system with an Intel i5-8257U@1.40GHz and 8GB of RAM and averaged over 10 random initializations, the reduced network trained in  $15.32 \pm 2.53$  seconds and the original network trained in  $31.24 \pm 4.55$  seconds.

**(4) Comparison with ReLU MLP on noisy image recovery.** We show that a Step-ReLU radial network performs better than an otherwise comparable network with pointwise ReLU on a noisy image recovery task. Using samples of MNIST with significant added noise the network classification task is to identify from which original sample the noisy sample derives.

Specifically, we choose  $n$  samples from MNIST, all with the same MNIST label, and produce  $m$  noisy samples from each by adding noise. The noise is added by considering each sample as a point in  $\mathbb{R}^{784}$ , and adding uniform random noise in a ball around each. The radius of the ball around a given point is the product of the noise level variable (`noise_scale`, which is the same for all points) and the minimal distance to another sample point (which varies from point to point). As indicated in Figure 5 when `noise_scale=3` the classification task is difficult for the human eye.

Our data takes  $n = 3$  original MNIST images with the same label, and produces  $m = 100$  noisy images for each, with `noise_scale=3`. We perform a 240 train / 60 test split of the 300 data points. Both models have three layers with widths  $(d, d+1, d+2, n=3)$ , where  $d = 28^2 = 784$ ; hence, both models have 620, 158 trainable parameters

Over 10 trials, each training for 150 epochs and learning rate 0.05 for both models, the radial network achieves training loss  $0.00256 \pm 3.074 \cdot 10^{-4}$  with accuracy  $1 \pm 0$ , while the ReLU MLP has training loss  $0.295 \pm 2.259 \cdot 10^{-1}$  with accuracy  $0.768 \pm 2.199 \cdot 10^{-1}$ . On the test set, the radial network has loss  $0.00266 \pm 3.749 \cdot 10^{-4}$  with accuracy  $1 \pm 0$ , while the ReLU MLP has loss  $0.305 \pm 2.588 \cdot 10^{-1}$  with accuracy  $0.757 \pm 2.464 \cdot 10^{-1}$ . The convergence rates are illustrated in Figure 5 with the radial network outperforming the ReLU MLP. We note that 150 epochs is sufficient for all methods to converge, although the ReLU MLP does not always converge to zero loss.

We observe that the radial network 1) is able to obtain a better fit, 2) has faster convergence, and 3) generalizes better than the pointwise ReLU. We hypothesize the radial nature of the random noise makes radials networks well-adapted to the task.

## F RELATION TO RADIAL BASIS FUNCTION NETWORKS

In this appendix, we show that radial neural networks are equivalent to a particular class of multilayer radial basis functions networks. This class is obtained by imposing the condition that the so-called ‘hidden dimension’ at each layer is equal to one; the total number of layers, however, is unconstrained. To our knowledge, the literature contains no universal approximation result for this class of radial basis functions networks.

### F.1 SINGLE LAYER CASE

We first recall the definition of a radial basis function network. A *local linear model extension of a radial basis function network* (henceforth abbreviated simply by *RBFN*) consists of:

- An input dimension  $n$ , an output dimension  $m$ , and a ‘hidden’ dimension  $N$ .
- For  $i = 1, \dots, N$ , a matrix  $W_i \in \mathbb{R}^{m \times n}$ , a vector  $b_i \in \mathbb{R}^n$ , and a weight  $a_i \in \mathbb{R}^m$ .
- A nonlinear function<sup>7</sup>  $\lambda : \mathbb{R} \rightarrow \mathbb{R}$ .

<sup>7</sup>A more general version allows for a different nonlinear function for every  $i = 1, \dots, N$ .

The feedforward function of a RBFN is defined as:

$$F : \mathbb{R}^n \rightarrow \mathbb{R}^m \quad x \mapsto \sum_{i=1}^N (a_i + W_i(x + b_i)) \lambda(|x + b_i|).$$

The integer  $N$  is commonly referred to as ‘the hidden number of neurons’. This is a bit of a misnomer. Really there is only one layer with input dimension  $n$  and output dimension  $m$ ; the integer  $N$  is part of the specification of the activation function.

We observe that if  $N = 1$  and  $a_1 = 0$ , then the feedforward function is given by:

$$F : \mathbb{R}^n \rightarrow \mathbb{R}^m \quad x \mapsto W\rho(x + b)$$

where  $\rho$  is the radial rescaling function determined by  $\lambda$ . In words, one adds  $b_1 = b \in \mathbb{R}^n$  to the input vector  $x$ , applies the activation  $\rho$  to obtain new vector in  $\mathbb{R}^n$ , and then applies the linear transformation determined by the matrix  $W_1 = W$  to obtain the output vector in  $\mathbb{R}^m$ . Motivated by this observation, we say that a RBFN is *constrained* if  $N = 1$  and  $a_1 = 0$ .

## F.2 CONSTRAINED MULTILAYER CASE

Next, we consider the constrained multilayer case of a radial basis functions network. Specifically, a *constrained multilayer* RBFN consists of:

- A widths vector  $(n_0, \dots, n_L)$  where  $L$  is the number of layers.
- A matrix  $W_\ell \in \mathbb{R}^{n_\ell \times n_{\ell-1}}$  for  $\ell = 1, \dots, L$ .
- A vector  $b_\ell \in \mathbb{R}^{n_\ell}$  for  $\ell = 0, 1, \dots, L - 1$ .
- A nonlinear function  $\lambda_\ell : \mathbb{R} \rightarrow \mathbb{R}$  for  $\ell = 0, 1, \dots, L - 1$ . (Equivalently, the corresponding radial rescaling function  $\rho_\ell : \mathbb{R}^{n_\ell} \rightarrow \mathbb{R}^{n_\ell}$  for  $\ell = 0, \dots, L - 1$ .)

The feedforward function is defined as follows. For  $\ell = 0, \dots, L$ , we recursively define  $F_\ell : \mathbb{R}^{n_0} \rightarrow \mathbb{R}^{n_\ell}$  by setting  $F_0(x) = x$  and

$$F_\ell(x) = W_\ell \rho_{\ell-1}(F_{\ell-1}(x) + b_{\ell-1})$$

for  $\ell = 1, \dots, L$ . The feedforward function is  $F_L$ .

## F.3 RELATION TO RADIAL NEURAL NETWORKS

We now demonstrate that radial neural networks are equivalent to constrained multilayer RBFNs.

**Proposition 27.** *For any radial neural network, there is a constrained multilayer RBFN with the same feedforward function. Conversely, for any constrained multilayer RBFN, there is a radial neural network with the same feedforward function.*

*Proof.* For the first statement, let  $(\mathbf{W}, \mathbf{b}, \rho)$  be a radial neural network with  $L$  layers and widths vector  $(n_0, \dots, n_L)$ . Recall the partial feedforward functions  $G_\ell : \mathbb{R}^{n_0} \rightarrow \mathbb{R}^{n_\ell}$  defined recursively by setting  $G_0(x) = x$  and

$$G_\ell(x) = \rho_\ell(W_\ell G_{\ell-1}(x) + b_\ell)$$

The feedforward function is  $G_L$ . Consider the constrained multilayer RBFN with  $L + 1$  layers and the following:

- Widths vector  $(n_0, n_1, \dots, n_{L-1}, n_L, n_L)$ . The last two layers have the same dimension.
- Weight matrices  $W_\ell \in \mathbb{R}^{n_\ell \times n_{\ell-1}}$  for  $\ell = 1, \dots, L$  and  $W_{L+1} = \text{id}_{n_L} \in \mathbb{R}^{n_L \times n_L}$ .
- A vector  $b_\ell \in \mathbb{R}^{n_\ell}$  for  $\ell = 1, \dots, L$ , and  $b_0 = 0 \in \mathbb{R}^{n_0}$ .
- A radial rescaling activation  $\rho_\ell : \mathbb{R}^{n_\ell} \rightarrow \mathbb{R}^{n_\ell}$  for  $\ell = 1, \dots, L$ , and  $\rho_0 = \text{id}_{n_0}$ .

Let  $F_\ell$  be the partial feedforward functions for this RBFN, defined recursively as above. We claim that

$$F_\ell(x) = W_\ell \circ G_{\ell-1}(x)$$

for any  $x \in \mathbb{R}^{n_0}$  and  $\ell = 1, \dots, L$ . We prove this by induction. The base case is  $\ell = 1$ :

$$F_1(x) = W_1 \circ \rho_0(F_0(x) + b_0) = W_1 x = W_1 \circ G_0(x)$$

For the induction step, take  $\ell > 1$  and compute:

$$F_\ell(x) = W_\ell \circ \rho_{\ell-1}(F_{\ell-1}(x) + b_{\ell-1}) = W_\ell \circ \rho_{\ell-1}(W_{\ell-1}G_{\ell-2}(x) + b_{\ell-1}) = W_\ell \circ G_{\ell-1}(x)$$

The first claim now follows from the case  $\ell = L$ , using the fact that  $W_{L+1}$  is the identity.

For the second statement, let  $(\mathbf{W}, \mathbf{b}, \rho)$  be a constrained multilayer RBFN with  $L$  layers and widths vector  $(n_0, \dots, n_L)$ . Consider the radial neural network with  $L + 1$  layers and the following:

- Widths vector  $(n_0, n_0, n_1, \dots, n_{L-1}, n_L)$ . The first two layers have the same dimension.
- Weight matrices given by  $\tilde{W}_1 = \text{id}_{n_0}$  and  $\tilde{W}_\ell = W_{\ell-1}$  for  $\ell = 2, \dots, L + 1$ .
- Bias vectors given by  $\tilde{b}_\ell = b_{\ell-1}$  for  $\ell = 1, 2, \dots, L$ , and  $\tilde{b}_{L+1} = 0$ .
- Radial rescaling activations given by  $\tilde{\rho}_\ell = \rho_{\ell-1}$  for  $\ell = 1, \dots, L$ , and  $\tilde{\rho}_{L+1} = \text{id}_{n_L}$ .

One uses the recursive definition of the partial feedforward functions to show that, for  $\ell = 1, \dots, L$ , we have  $F_\ell(x) = W_\ell \circ G_\ell(x)$ , where  $F_\ell$  and  $G_\ell$  are the partial feedforward functions of the RBFN and radial neural network, respectively. Then:

$$G_{L+1}(x) = \tilde{\rho}_{L+1}(\tilde{W}_{L+1} \circ G_L(x) + \tilde{b}_{L+1}) = W_L \circ G_L(x) = F_L(x),$$

so the two feedforward functions coincide.  $\square$

#### F.4 CONCLUSIONS

While radial neural networks are equivalent to a certain class of radial basis function network, we point out differences between our results and the standard theory of radial basis functions network. First, RBFNs generally only have two layers; we consider ones with unbounded depth. Second, to our knowledge, ours is the first universal approximation result such that:

- it uses networks in the subclass of multilayer RBFNs satisfying the constraint that all the number of ‘hidden neurons’ in each layer is equal to 1.
- it approximates functions with networks of bounded width.
- it can be used to approximate asymptotically affine functions, rather than functions defined on a compact domain.

Our compressibility result may apply to multilayer RBFNs where the number of ‘hidden neurons’  $N_\ell$  at each layer is not equal to 1, but we expect the compression to be weaker, and that constrained multilayer RBFNs are in some sense the most compressible type of RBFN.
